# Supplementary material for: UK Livestock Futures: Co-designing Shared Socioeconomic Pathways
Source: Research Square preprint supplement (doi:10.21203/rs.3.rs-8311257/v1), 2025-12-12
Supplement: Supplementary file 3 [file 8c6d34636f81d0e913c5797a.pdf]

# Supplementary Material 3: System Diagrams

## UK Livestock Futures

### Co-designing Shared Socioeconomic Pathways

**Kirsty Blair <sup>1,2,\*</sup> Isabel Fletcher <sup>1,3</sup>, Jay Burns <sup>1</sup>, Peter Alexander <sup>1,2</sup>, Dominic Moran <sup>1</sup>**

<sup>1</sup>*The Division of Global Agriculture and Food Systems, University of Edinburgh;* <sup>2</sup>*School of GeoSciences, University of Edinburgh;* <sup>3</sup>*University of Edinburgh Business School*

\*Corresponding author: Kirsty Blair, email: [kirsty.blair@ed.ac.uk](mailto:kirsty.blair@ed.ac.uk)

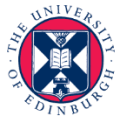

THE UNIVERSITY of EDINBURGH  
The Royal (Dick) School  
of Veterinary Studies

**Global Agriculture and  
Food Systems**

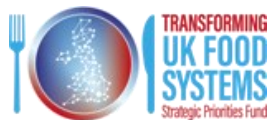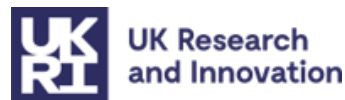

*This research is part of the TRAnsforming the DEbate about livestock systems transformation (TRADE) project, funded under UKRI grant number BB/W018152/1*

# UK-Livestock-SSP1: Sustainable Transformation

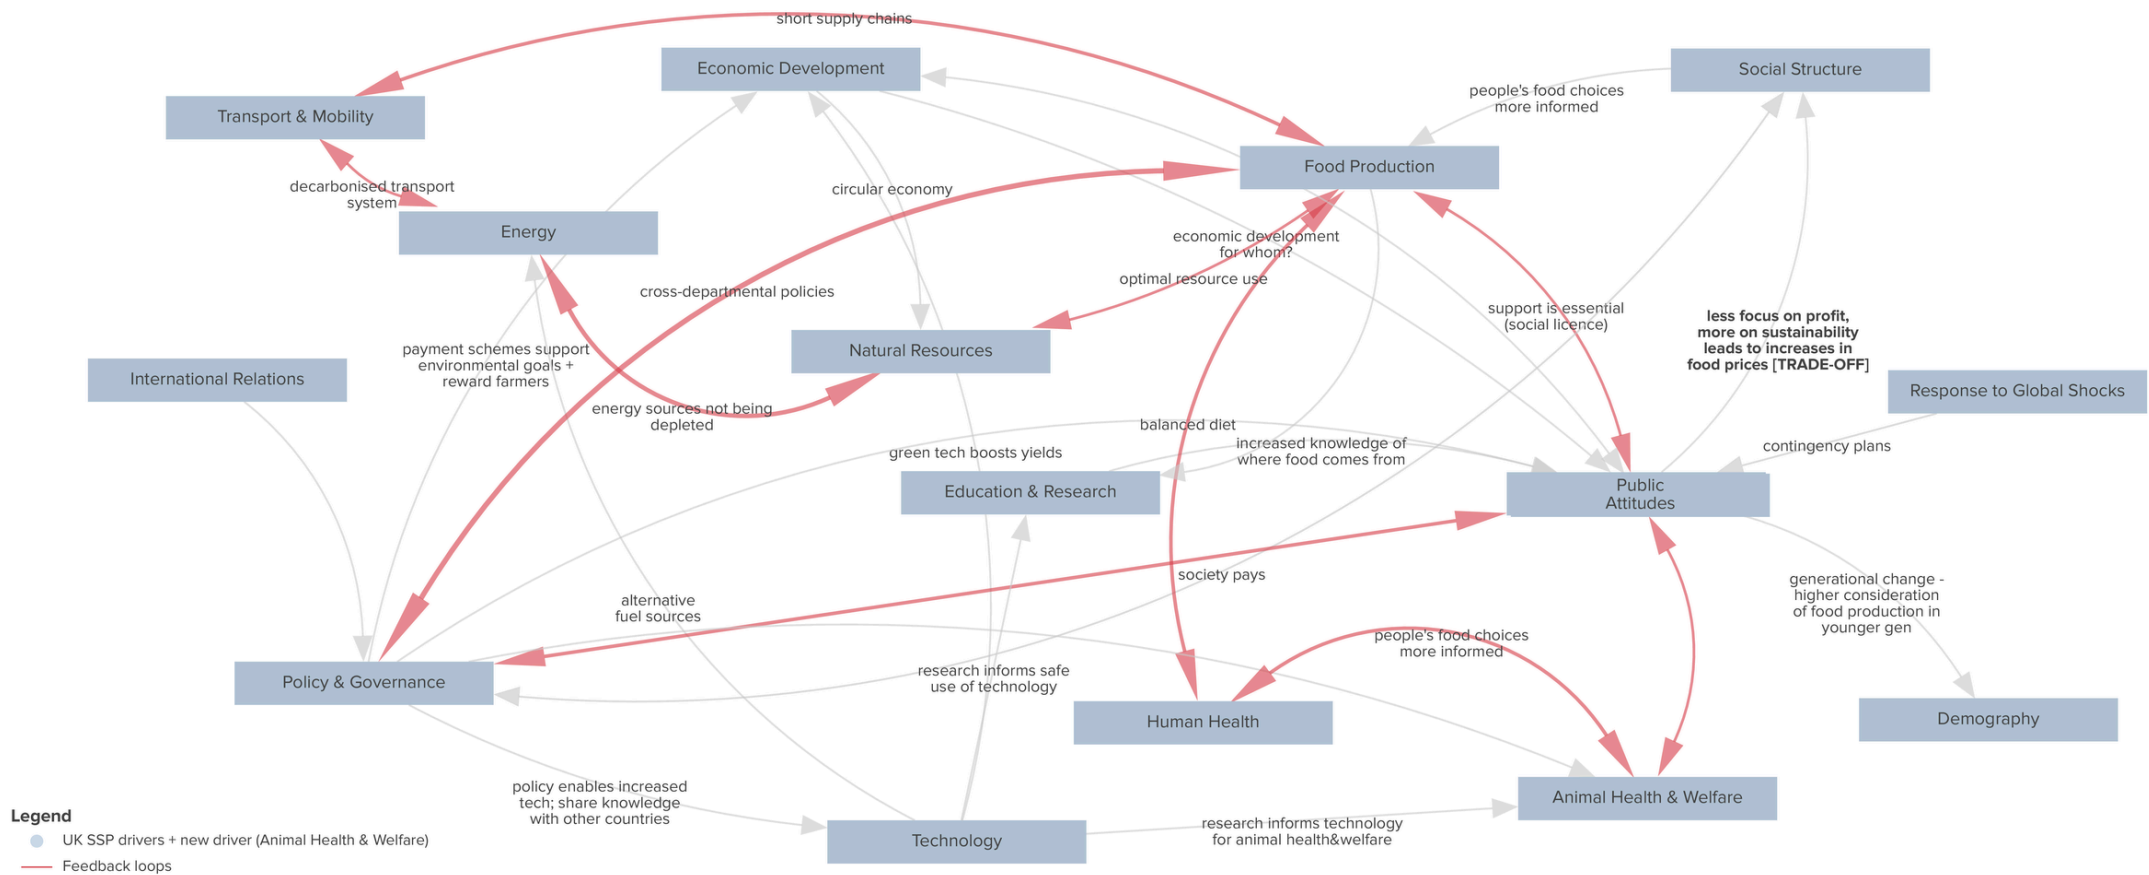

# UK-Livestock-SSP2: Middle of the Road

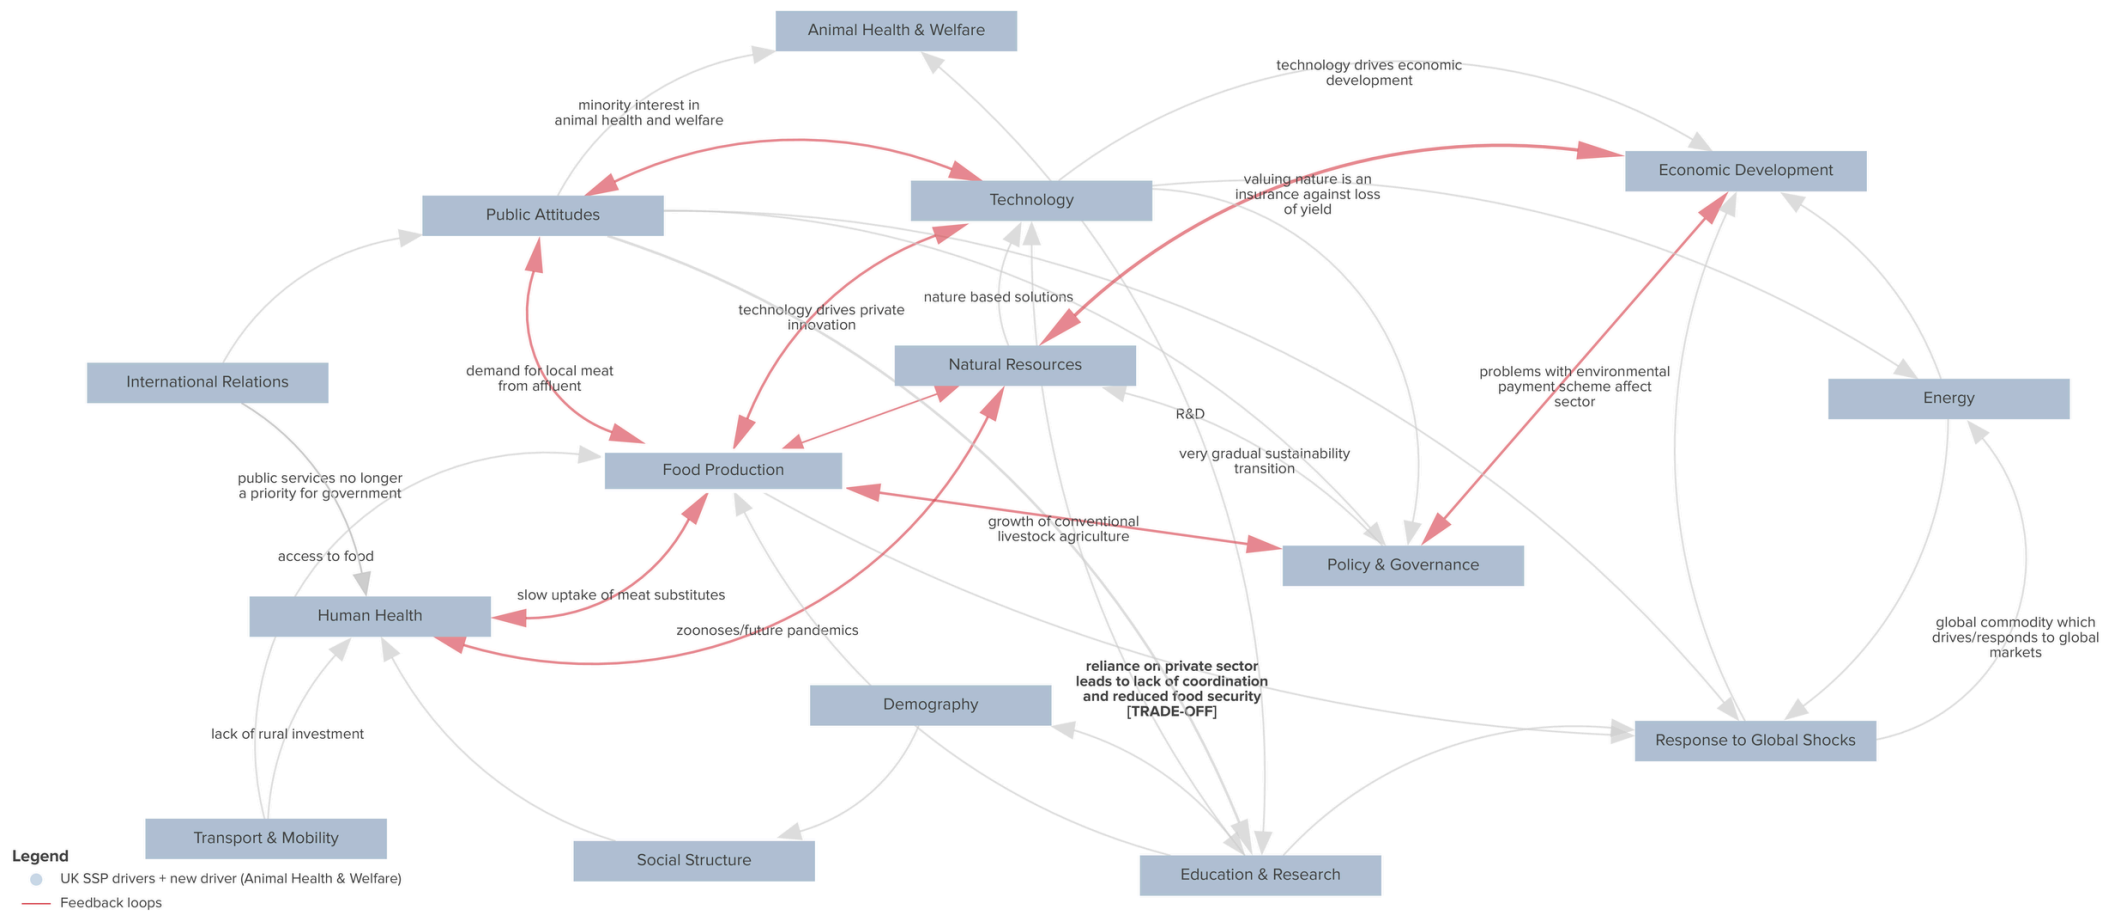

# UK-Livestock-SSP3: Regional Rivalry

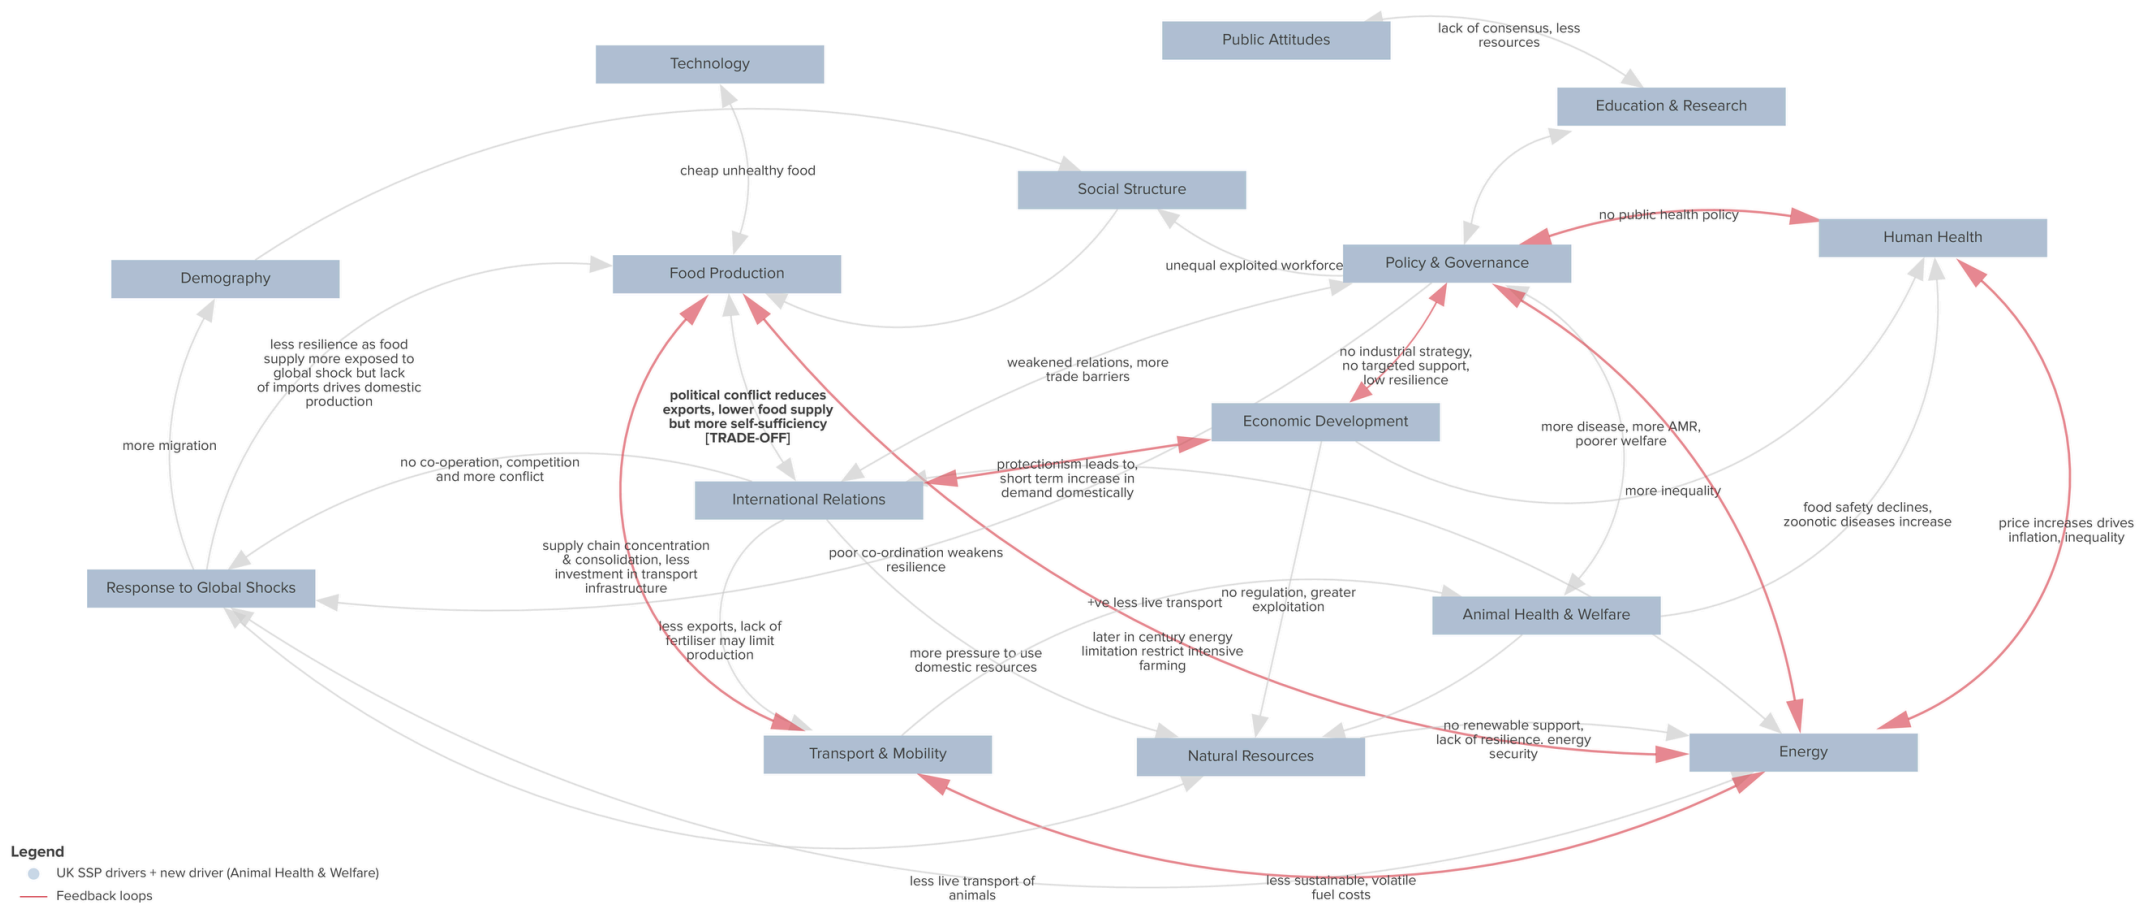

# UK-Livestock-SSP4: Inequality

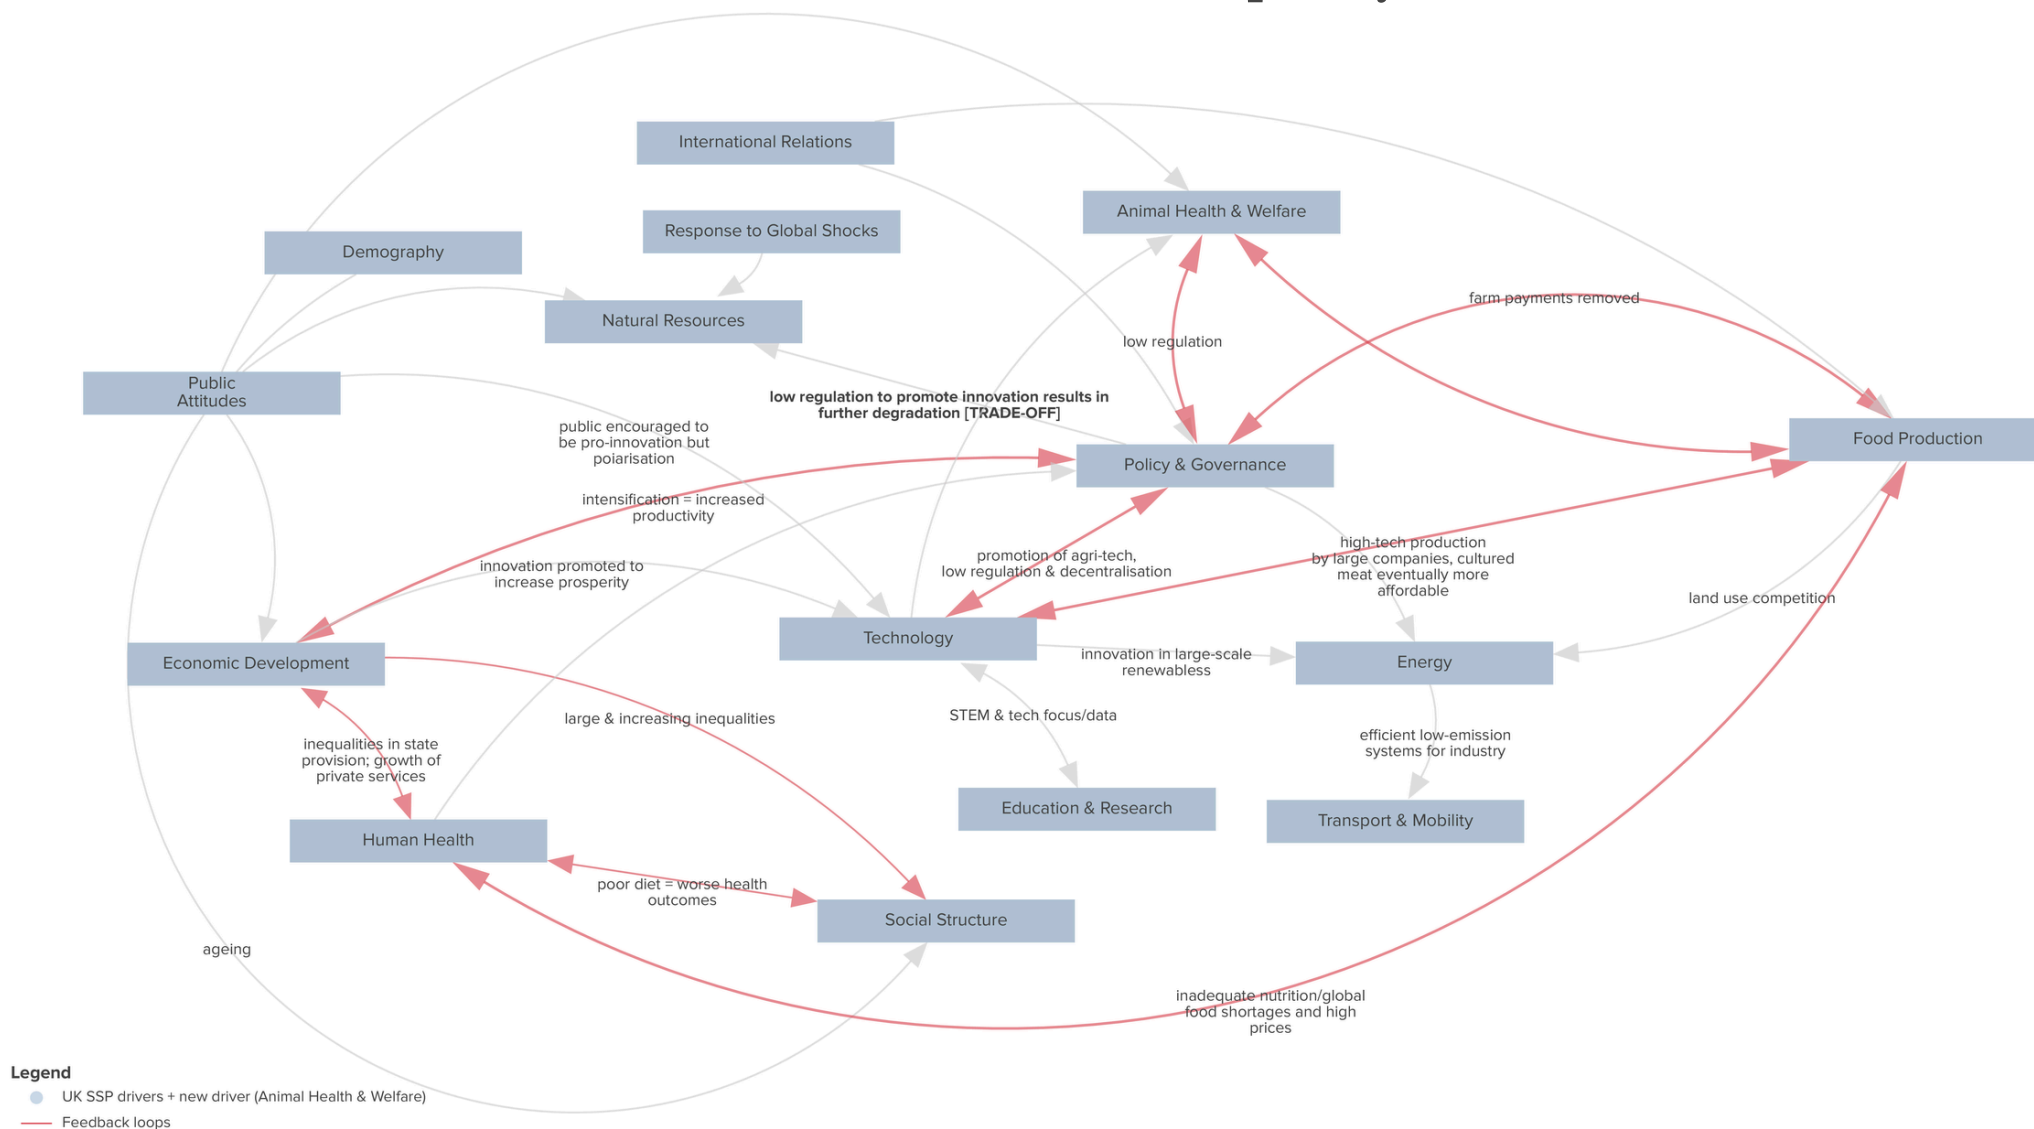

## UK-Livestock-SSP5: Fossil-Fuelled Development

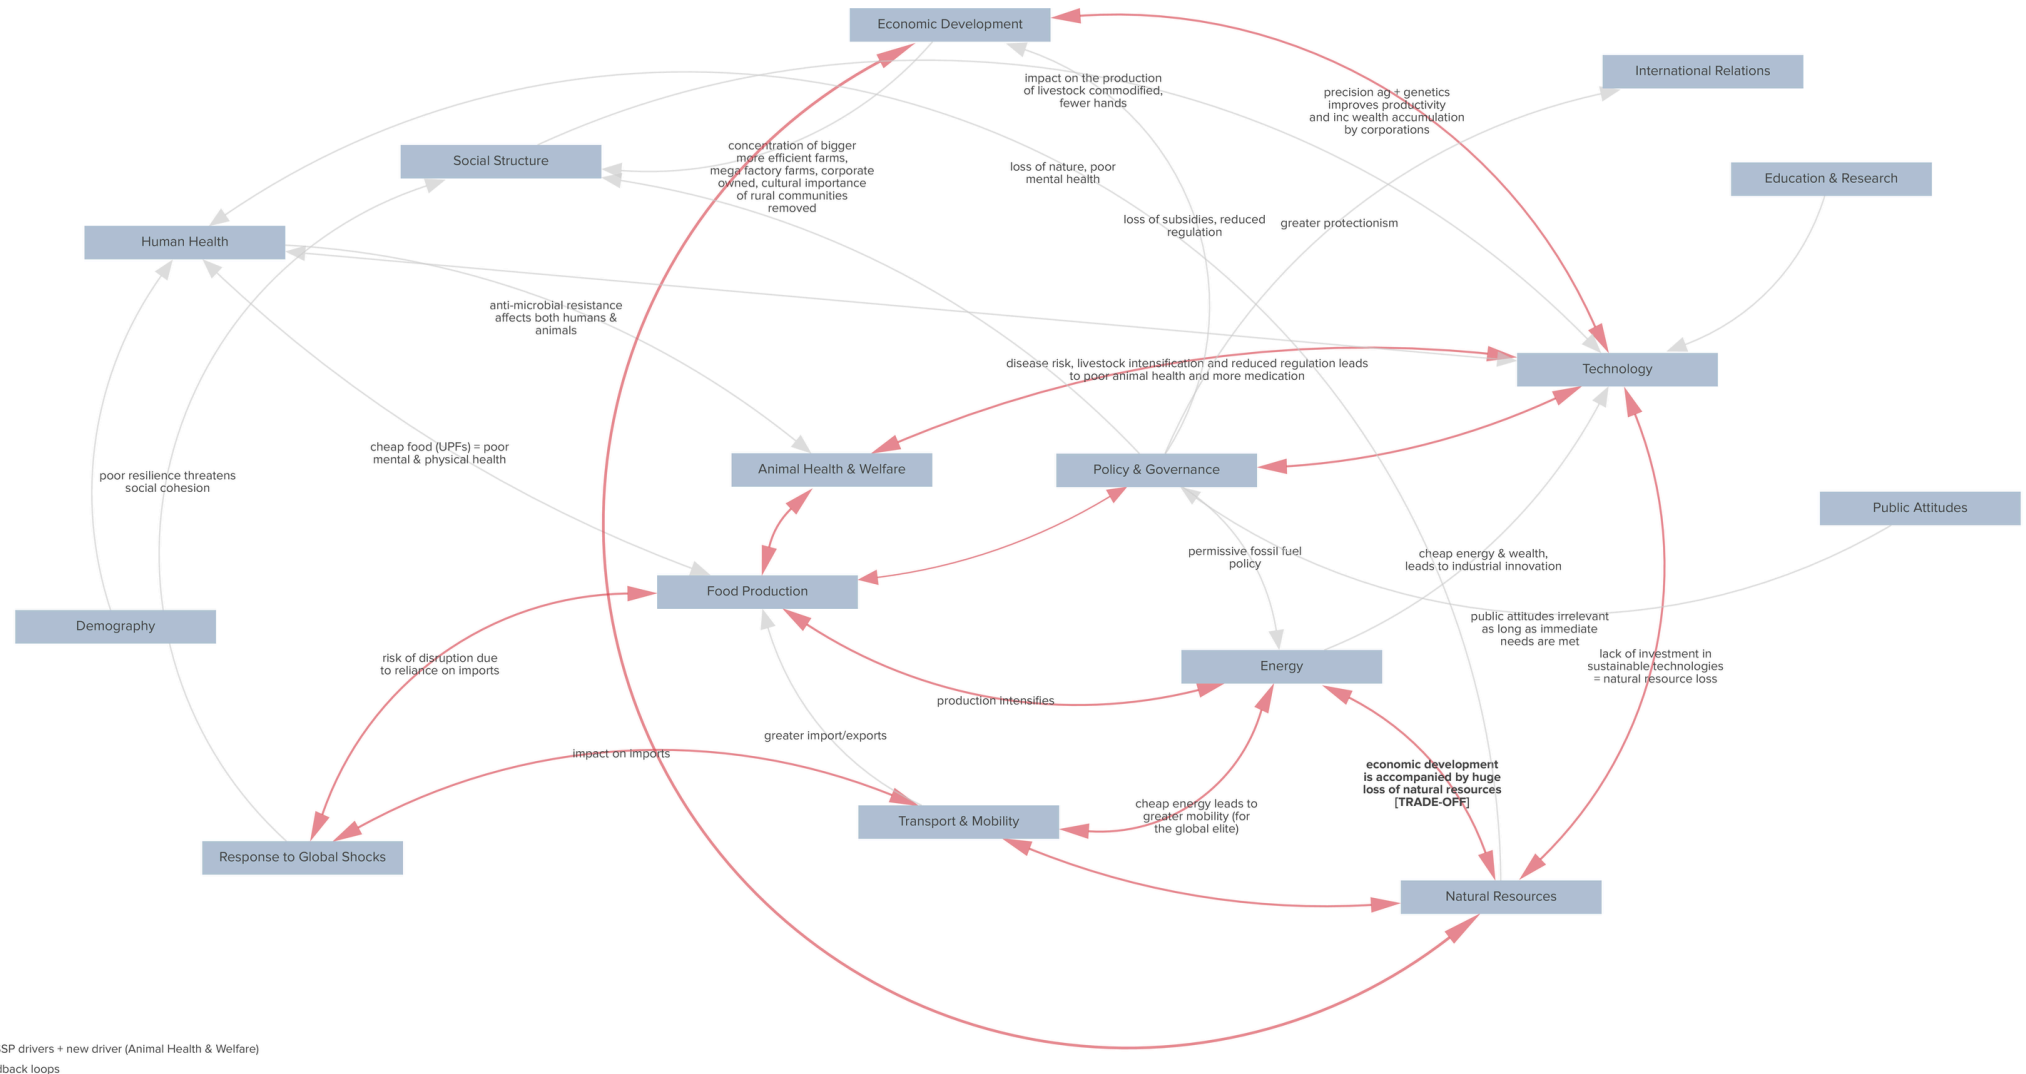

*This research is part of the TRAnsforming the DEbate about livestock systems transformation (TRADE) project, funded under UKRI grant number BB/W018152/1.*
