# Supplementary material for: UK Livestock Futures: Co-designing Shared Socioeconomic Pathways
Source: Research Square preprint supplement (doi:10.21203/rs.3.rs-8311257/v1), 2025-12-12
Supplement: Supplementary file 4 [file c68fa53f02f4a23342994f4d.pdf]

# Supplementary Material 1: Drivers of Change, SSP Mapping, and Key Workshop Outcomes

## UK Livestock Futures

### Co-designing Shared Socioeconomic Pathways

**Kirsty Blair <sup>1,2\*</sup> Isabel Fletcher <sup>1,3</sup>, Jay Burns <sup>1</sup>, Peter Alexander <sup>1,2</sup>, Dominic Moran <sup>1</sup>**

<sup>1</sup>*The Division of Global Agriculture and Food Systems, University of Edinburgh;*

<sup>2</sup>*School of GeoSciences, University of Edinburgh;* <sup>3</sup>*University of Edinburgh Business School*

\*Corresponding author: Kirsty Blair, email: [kirsty.blair@ed.ac.uk](mailto:kirsty.blair@ed.ac.uk)

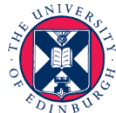

THE UNIVERSITY of EDINBURGH  
The Royal (Dick) School  
of Veterinary Studies

**Global Agriculture and  
Food Systems**

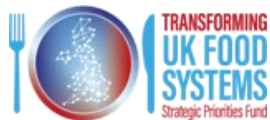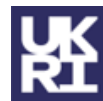

**UK Research  
and Innovation**

*This research is part of the TRAnsforming the DEbate about livestock systems transformation (TRADE) project, funded under UKRI grant number BB/W018152/1*

## List of Tables

|                                                                 |    |
|-----------------------------------------------------------------|----|
| Table 1 Drivers of Change .....                                 | 2  |
| Table 2 SSP1 Mapping.....                                       | 13 |
| Table 3 SSP2 Mapping.....                                       | 18 |
| Table 4 SSP3 Mapping.....                                       | 24 |
| Table 5 SSP4 Mapping.....                                       | 30 |
| Table 6 SSP5 Mapping.....                                       | 33 |
| Table 7 Key outcomes and suggestions from Workshop 1 and 2..... | 38 |

**Table 1 Drivers of Change**

| <i>Workshop</i> | <i>Categories</i>                            | <i>Theme</i> | <i>Driver</i>                                          |
|-----------------|----------------------------------------------|--------------|--------------------------------------------------------|
| 1               | UK/Devolved Government Policy and Governance | Governance   | regulation of herbicides/pesticides                    |
| 1               | UK/Devolved Government Policy and Governance | Governance   | internal market act                                    |
| 1               | UK/Devolved Government Policy and Governance | Governance   | land reform                                            |
| 1               | UK/Devolved Government Policy and Governance | Governance   | agricultural policy changes                            |
| 1               | UK/Devolved Government Policy and Governance | Governance   | new legislation on the use of technology               |
| 1               | UK/Devolved Government Policy and Governance | Governance   | region 2/3 subsidy rules                               |
| 1               | UK/Devolved Government Policy and Governance | Governance   | confidence in support                                  |
| 1               | UK/Devolved Government Policy and Governance | Governance   | slaughter regulation - private kill                    |
| 1               | UK/Devolved Government Policy and Governance | Governance   | land reform                                            |
| 1               | UK/Devolved Government Policy and Governance | Governance   | government subsidies impact farming practices          |
| 1               | UK/Devolved Government Policy and Governance | Governance   | devolution and internal trade                          |
| 1               | UK/Devolved Government Policy and Governance | Governance   | multi-polar world - conflict and impact on production  |
| 1               | UK/Devolved Government Policy and Governance | Governance   | uncertainty of policy landscape                        |
| 1               | UK/Devolved Government Policy and Governance | Governance   | instability of domestic and global politics            |
| 1               | UK/Devolved Government Policy and Governance | Governance   | legacy of WW2 food shortage                            |
| 1               | UK/Devolved Government Policy and Governance | Governance   | Bhutan measure happiness not GDP                       |
| 1               | UK/Devolved Government Policy and Governance | Governance   | red tape (regulation, environmental, food safety etc.) |
| 1               | UK/Devolved Government Policy and Governance | Governance   | always adding to red tape never reducing it            |
| 1               | UK/Devolved Government Policy and Governance | Governance   | level playing field                                    |
| 1               | UK/Devolved Government Policy and Governance | Governance   | inconsistency and uncertainty in government policy     |

|   |                                              |            |                                                                                                                                                               |
|---|----------------------------------------------|------------|---------------------------------------------------------------------------------------------------------------------------------------------------------------|
| 1 | UK/Devolved Government Policy and Governance | Governance | procurement                                                                                                                                                   |
| 2 | UK/Devolved Government Policy and Governance | Governance | uneven playing field - same markets but different income groups                                                                                               |
| 2 | UK/Devolved Government Policy and Governance | Governance | upland sheep = commons                                                                                                                                        |
| 2 | UK/Devolved Government Policy and Governance | Governance | 19% of land affected by DEFRA's proposals to reduce amount + intensity of farmed land                                                                         |
| 2 | UK/Devolved Government Policy and Governance | Governance | inheritance tax                                                                                                                                               |
| 2 | UK/Devolved Government Policy and Governance | Governance | policy/attitudes to farmers focus on productivity and effects on profit                                                                                       |
| 2 | UK/Devolved Government Policy and Governance | Governance | policy capture and power imbalance re representation of perspectives                                                                                          |
| 2 | UK/Devolved Government Policy and Governance | Governance | government inefficiency re spend - paying for food 4 times (support payments, mitigating environmental damage, consumer food prices and cost to NHS of diets) |
| 2 | UK/Devolved Government Policy and Governance | Governance | government pace of change and willingness to deliver ambitious/forward-looking change                                                                         |
| 2 | UK/Devolved Government Policy and Governance | Governance | divergence of policy within the UK                                                                                                                            |
| 2 | UK/Devolved Government Policy and Governance | Governance | delay in developing support systems leads to early adopter fear of being penalised                                                                            |
| 2 | UK/Devolved Government Policy and Governance | Governance | Scottish government listening to groups like NFU rather than others - values and culture of government                                                        |
| 2 | UK/Devolved Government Policy and Governance | Governance | government money available but admin needs improving                                                                                                          |
| 2 | UK/Devolved Government Policy and Governance | Governance | short-term policies based on out-dated science                                                                                                                |
| 2 | UK/Devolved Government Policy and Governance | Governance | timing for grants, hold-ups with applications - farming is seasonal                                                                                           |
| 2 | UK/Devolved Government Policy and Governance | Governance | policy lack local knowledge/context - not suited to my type/size of farm                                                                                      |
| 2 | UK/Devolved Government Policy and Governance | Governance | IMA means any food produced needs to go to all 4 UK countries despite opposition                                                                              |
| 2 | UK/Devolved Government Policy and Governance | Governance | weak government levy boards - not raising the bar                                                                                                             |
| 2 | UK/Devolved Government Policy and Governance | Governance | UK agree core food and animal welfare standards in trade policy                                                                                               |
| 2 | UK/Devolved Government Policy and Governance | Governance | clear government food and farming strategy                                                                                                                    |
| 2 | Other                                        | Governance | funding for investment, particularly infrastructure e.g. slurry management, fencing                                                                           |
| 1 | Other                                        | Governance | corporate disclosure frameworks                                                                                                                               |
| 1 | Other                                        | Governance | communication                                                                                                                                                 |
| 1 | International Relations                      | Governance | geopolitical upheaval and conflict                                                                                                                            |

|   |                         |                                 |                                                                                                                    |
|---|-------------------------|---------------------------------|--------------------------------------------------------------------------------------------------------------------|
| 1 | International Relations | Governance                      | growing protectionism, emergence of rival trade blocs (i.e. EU, BRICS etc) and reduction in free trade             |
| 1 | International Relations | Governance                      | commodity values - grain - and tariffs                                                                             |
| 1 | International Relations | Governance                      | trade agreements with recognition to the value of agriculture                                                      |
| 1 | International Relations | Governance                      | Brexit = lack of market access, expensive to trade, vulnerable to markets                                          |
| 1 | International Relations | Governance                      | post-Brexit regulatory divergence (passive)                                                                        |
| 1 | International Relations | Governance                      | international conflicts - Brexit, Ukraine                                                                          |
| 1 | International Relations | Governance                      | international carbon policy mechanism (C BAM)                                                                      |
| 1 | International Relations | Governance                      | cost of imports                                                                                                    |
| 1 | International Relations | Governance                      | global trade (can be fast)                                                                                         |
| 2 | International Relations | Governance                      | greater alignment with EU rather than US                                                                           |
| 2 | International Relations | Governance                      | free-trade agreements with US undercutting prices and regulation                                                   |
| 2 | International Relations | Governance                      | risk of export competition (sheep)                                                                                 |
| 2 | International Relations | Governance                      | less imported sheep from NZ                                                                                        |
| 2 | International Relations | Governance                      | (lack of) core environmental standards                                                                             |
| 2 | International Relations | Governance                      | collapse of trade rules due to Trump                                                                               |
| 1 | Transport and Mobility  | Production Systems and Land Use | increasing cost of food distribution if carbon costs are truly accounted for                                       |
| 1 | Transport and Mobility  | Production Systems and Land Use | lack of critical infrastructure e.g. abattoirs                                                                     |
| 1 | Transport and Mobility  | Production Systems and Land Use | lack of processing infrastructure e.g. abattoirs leading to potential loss of 'critical mass' for livestock sector |
| 2 | Transport and Mobility  | Production Systems and Land Use | AFNs need for logistical solution to achieve net zero                                                              |
| 2 | Transport and Mobility  | Production Systems and Land Use | access to local abattoirs - currently long distances, bad for animals and fuel costs                               |
| 2 | Transport and Mobility  | Production Systems and Land Use | government small abattoir grants                                                                                   |
| 1 | Technology              | Production Systems and Land Use | precision farming                                                                                                  |
| 1 | Technology              | Production Systems and Land Use | availability and use of data                                                                                       |
| 1 | Technology              | Production Systems and Land Use | precision breeding                                                                                                 |
| 1 | Technology              | Production Systems and Land Use | ethical constraints and consumer resistance to use of some technologies                                            |
| 1 | Technology              | Production Systems and Land Use | innovation investment across all areas of livestock (e.g. eid-management) to deliver efficiency gains              |
| 1 | Technology              | Production Systems and Land Use | smart data - automation, oestrus, temperature                                                                      |
| 2 | Technology              | Production Systems and Land Use | social media can be used to weaponise production system                                                            |
| 2 | Technology              | Production Systems and Land Use | social media can create opportunities for transparency                                                             |

|   |                           |                                 |                                                                                                                              |
|---|---------------------------|---------------------------------|------------------------------------------------------------------------------------------------------------------------------|
| 2 | Technology                | Production Systems and Land Use | plant and animal breeding research to improve N and P acquisition and reduce emissions                                       |
| 2 | Technology                | Production Systems and Land Use | a lot of farmers (especially younger ones) very engaged                                                                      |
| 2 | Technology                | Production Systems and Land Use | need to recognise the value of particular technologies                                                                       |
| 2 | Technology                | Production Systems and Land Use | nature-based solutions versus tech                                                                                           |
| 2 | Technology                | Production Systems and Land Use | technology as a band aid - risk of assumption re carbon and biodiversity                                                     |
| 2 | Technology                | Production Systems and Land Use | not all farmers have connectivity - lack of time and digital skills                                                          |
| 2 | Technology                | Production Systems and Land Use | admin burden, red tape                                                                                                       |
| 2 | Technology                | Production Systems and Land Use | government decision on new tech e.g. precision breeding, new protein production                                              |
| 2 | Technology                | Production Systems and Land Use | government to put money into meat alternatives e.g. fermentation, cell-based                                                 |
| 1 | Response to Global Shocks | Production Systems and Land Use | weakness of UN systems to control and mitigate effects of global shocks                                                      |
| 1 | Response to Global Shocks | Production Systems and Land Use | potential permanent loss of farmland globally due to either climate change or nuclear fallout                                |
| 1 | Response to Global Shocks | Production Systems and Land Use | impact of conflicts on global supply chains (e.g. Ukraine)                                                                   |
| 1 | Response to Global Shocks | Production Systems and Land Use | reliance on food imports is a risk for domestic food production (animal + food in general)                                   |
| 1 | Response to Global Shocks | Production Systems and Land Use | domestic supply chain infrastructure                                                                                         |
| 1 | Response to Global Shocks | Production Systems and Land Use | UK government Defence of the Realm Act powers                                                                                |
| 1 | Response to Global Shocks | Production Systems and Land Use | shocks, natural disasters, war                                                                                               |
| 2 | Response to Global Shocks | Production Systems and Land Use | climate shocks and challenging weather patterns                                                                              |
| 2 | Response to Global Shocks | Production Systems and Land Use | avian flu                                                                                                                    |
| 2 | Response to Global Shocks | Production Systems and Land Use | supporting AFNs improves resilience                                                                                          |
| 2 | Response to Global Shocks | Production Systems and Land Use | commodity price fluctuation e.g. fertiliser                                                                                  |
| 2 | Response to Global Shocks | Production Systems and Land Use | price spikes due to geopolitical events e.g. effect of war in Ukraine on food and fertiliser prices                          |
| 2 | Response to Global Shocks | Production Systems and Land Use | protectionist trade measures and increased focus on food security                                                            |
| 2 | Response to Global Shocks | Production Systems and Land Use | global markets e.g. fertiliser                                                                                               |
| 2 | Other                     | Production Systems and Land Use | insurance against risks in supply chain - financial institutions not willing to insure if not taking steps to mitigate risks |
| 2 | Other                     | Production Systems and Land Use | holistic sustainability indicators and monitoring                                                                            |

|   |                   |                                 |                                                                                                       |
|---|-------------------|---------------------------------|-------------------------------------------------------------------------------------------------------|
| 2 | Other             | Production Systems and Land Use | support for smaller farms who can't employ specialists                                                |
| 2 | Other             | Production Systems and Land Use | staffing                                                                                              |
| 2 | Other             | Production Systems and Land Use | high input costs                                                                                      |
| 1 | Other             | Production Systems and Land Use | carbon markets and natural capital                                                                    |
| 1 | Other             | Production Systems and Land Use | complexity - unpredictability of complex systems                                                      |
| 1 | Other             | Production Systems and Land Use | Climate Change Committee advice e.g. reducing livestock numbers and impact on policy                  |
| 1 | Other             | Production Systems and Land Use | genetic suitability of livestock to resilient and profitable livestock farm systems                   |
| 1 | Other             | Production Systems and Land Use | recognition and reward of the holistic role of livestock grazing could change the direction of travel |
| 1 | Other             | Production Systems and Land Use | land use profitability - alternative uses                                                             |
| 1 | Other             | Production Systems and Land Use | diversification of businesses e.g. integration of livestock in arable businesses                      |
| 1 | Other             | Production Systems and Land Use | input costs - feed                                                                                    |
| 1 | Other             | Production Systems and Land Use | growth of industrial agriculture and megafarms intensifying production                                |
| 1 | Other             | Production Systems and Land Use | removal of industrial energy from food production                                                     |
| 1 | Other             | Production Systems and Land Use | climate change; land use limitation; industrial energy rebalance UK                                   |
| 1 | Other             | Production Systems and Land Use | infrastructure supply chain                                                                           |
| 1 | Other             | Production Systems and Land Use | fear of bad outcome                                                                                   |
| 1 | Natural Resources | Production Systems and Land Use | climate change but specifically water availability                                                    |
| 1 | Natural Resources | Production Systems and Land Use | slower availability of technology in rural versus urban areas i.e. broadband                          |
| 1 | Natural Resources | Production Systems and Land Use | permanent land use change (e.g. forestry)                                                             |
| 1 | Natural Resources | Production Systems and Land Use | land use change e.g. forestry from farmland                                                           |
| 1 | Natural Resources | Production Systems and Land Use | climate (unpredictable and intense)                                                                   |
| 1 | Natural Resources | Production Systems and Land Use | water availability                                                                                    |
| 1 | Natural Resources | Production Systems and Land Use | corporate control                                                                                     |
| 1 | Natural Resources | Production Systems and Land Use | climate change - scenarios for 2 degrees, 3 degrees and 4 degrees                                     |
| 1 | Natural Resources | Production Systems and Land Use | climate                                                                                               |
| 1 | Natural Resources | Production Systems and Land Use | biology soil microbiome                                                                               |
| 1 | Natural Resources | Production Systems and Land Use | value of natural capital                                                                              |
| 1 | Natural Resources | Production Systems and Land Use | access to land/land use change availability                                                           |
| 2 | Natural Resources | Production Systems and Land Use | protection/deterioration of waterways e.g. River Wye                                                  |

|   |                      |                                 |                                                                                                       |
|---|----------------------|---------------------------------|-------------------------------------------------------------------------------------------------------|
| 2 | Natural Resources    | Production Systems and Land Use | enforcement of planning controls and less intensive operations                                        |
| 2 | Natural Resources    | Production Systems and Land Use | EU/UK legislation on deforestation - traceability using geotag location                               |
| 2 | Natural Resources    | Production Systems and Land Use | less land suitable for arable                                                                         |
| 2 | Natural Resources    | Production Systems and Land Use | some farmers feel forced to engage with natural resources via contracts, others pro-actively engaging |
| 2 | Natural Resources    | Production Systems and Land Use | land-sharing versus land-sparing                                                                      |
| 2 | Natural Resources    | Production Systems and Land Use | land-sparing would lead to dead zones around areas of very intensive production                       |
| 2 | Natural Resources    | Production Systems and Land Use | biodiversity loss - net zero without nature                                                           |
| 2 | Natural Resources    | Production Systems and Land Use | 75% of less favoured area in Scotland - less productive land                                          |
| 2 | Natural Resources    | Production Systems and Land Use | climate change and increased extreme weather events impacting land that lacks resilience              |
| 2 | Natural Resources    | Production Systems and Land Use | weather - water, droughts                                                                             |
| 1 | Energy               | Production Systems and Land Use | potential of increase in growth of biofuels                                                           |
| 1 | Energy               | Production Systems and Land Use | lack of alternatives to fossil fuels for bigger power users e.g. HGV, shipping                        |
| 1 | Energy               | Production Systems and Land Use | cost of inputs (fertiliser/fuel)                                                                      |
| 1 | Energy               | Production Systems and Land Use | climate changes concerns - via policy and grants                                                      |
| 1 | Energy               | Production Systems and Land Use | anaerobic digestion - energy crops                                                                    |
| 1 | Energy               | Production Systems and Land Use | corporates operating outwith the red tape                                                             |
| 1 | Energy               | Production Systems and Land Use | reclassification of livestock and meat products in relation to energy use                             |
| 2 | Energy               | Production Systems and Land Use | land use for energy crops often not spoken about                                                      |
| 2 | Energy               | Production Systems and Land Use | better data on methane oxidisation                                                                    |
| 2 | Energy               | Production Systems and Land Use | cost of renewables/conversion to clean power - more funding, who to trust?                            |
| 2 | Energy               | Production Systems and Land Use | develop systems that reduce reliance on energy                                                        |
| 1 | Economic Development | Production Systems and Land Use | low returns on capital invested in production and processes                                           |
| 1 | Economic Development | Production Systems and Land Use | critical mass of livestock sector, especially in Scotland                                             |
| 1 | Economic Development | Production Systems and Land Use | farmer profitability                                                                                  |
| 1 | Economic Development | Production Systems and Land Use | producer profitability                                                                                |
| 1 | Economic Development | Production Systems and Land Use | number of people working in agriculture in Scotland                                                   |
| 1 | Economic Development | Production Systems and Land Use | abattoirs                                                                                             |
| 1 | Economic Development | Production Systems and Land Use | inflation raising prices                                                                              |
| 1 | Economic Development | Production Systems and Land Use | profitability                                                                                         |

|   |                      |                                 |                                                                                                                            |
|---|----------------------|---------------------------------|----------------------------------------------------------------------------------------------------------------------------|
| 1 | Economic Development | Production Systems and Land Use | market signals                                                                                                             |
| 2 | Economic Development | Production Systems and Land Use | inheritance tax hinders diversification and succession                                                                     |
| 2 | Economic Development | Production Systems and Land Use | inheritance tax creates opportunities for reviewing and updating businesses                                                |
| 2 | Economic Development | Production Systems and Land Use | farmers need a reality check - their farm is a business                                                                    |
| 2 | Economic Development | Production Systems and Land Use | shift in mindset                                                                                                           |
| 2 | Economic Development | Production Systems and Land Use | financial risk preventing change - lack of support from government and private finance                                     |
| 2 | Economic Development | Production Systems and Land Use | market changes and disadvantage - risks of being left behind                                                               |
| 2 | Economic Development | Production Systems and Land Use | making changes can be scary for farmers - low margins so cautious about risks                                              |
| 2 | Economic Development | Production Systems and Land Use | support schemes for farmers to try changes with less risk                                                                  |
| 2 | Economic Development | Production Systems and Land Use | definition of economic resilience                                                                                          |
| 1 | Animal Health        | Production Systems and Land Use | burgeoning disease threats                                                                                                 |
| 1 | Animal Health        | Production Systems and Land Use | increased demand for higher welfare by consumers                                                                           |
| 1 | Animal Health        | Production Systems and Land Use | transition to higher welfare systems                                                                                       |
| 1 | Animal Health        | Production Systems and Land Use | antimicrobial resistance                                                                                                   |
| 1 | Animal Health        | Production Systems and Land Use | changing climate and increasing risk of epidemics and our readiness e.g. BTV-3                                             |
| 1 | Animal Health        | Production Systems and Land Use | awareness of positive welfare - Five Domains rather than Five Freedoms                                                     |
| 1 | Animal Health        | Production Systems and Land Use | animal health crisis                                                                                                       |
| 1 | Animal Health        | Production Systems and Land Use | cost of farm inputs - diesel concentrates                                                                                  |
| 1 | Animal Health        | Production Systems and Land Use | requirement of positive welfare (farm insurance, policy)                                                                   |
| 1 | Animal Health        | Production Systems and Land Use | perpetual ill-health                                                                                                       |
| 1 | Animal Health        | Production Systems and Land Use | big pharma built on unhealthy animals                                                                                      |
| 1 | Animal Health        | Production Systems and Land Use | disease                                                                                                                    |
| 2 | Animal Health        | Production Systems and Land Use | financial challenges on farm lead to poor animal health outcomes                                                           |
| 2 | Animal Health        | Production Systems and Land Use | reduced cost systems can lead to improved animal health                                                                    |
| 2 | Animal Health        | Production Systems and Land Use | new diseases resulting from climate change                                                                                 |
| 2 | Animal Health        | Production Systems and Land Use | dehorning as a sociological issue - farmers like to fit into groups too, going against standard practice can be criticised |

|   |                  |                                 |                                                                                                                                |
|---|------------------|---------------------------------|--------------------------------------------------------------------------------------------------------------------------------|
| 2 | Animal Health    | Production Systems and Land Use | keeping calf with mum cow can improve animal health but less market for it                                                     |
| 2 | Animal Health    | Production Systems and Land Use | ingrained methods need to be question e.g. calf-cow contact improves health by reducing mastitis and respiratory disease       |
| 2 | Animal Health    | Production Systems and Land Use | overuse of antibiotics - better tech for quick diagnosis                                                                       |
| 2 | Animal Health    | Production Systems and Land Use | integrated pest management to reduce dependence on endo/ectoparasiticides which have impacts on soil organisms and pollinators |
| 2 | Animal Health    | Production Systems and Land Use | tech can help animal health e.g. dairy                                                                                         |
| 2 | Animal Health    | Production Systems and Land Use | climate change, new emerging diseases                                                                                          |
| 2 | Animal Health    | Production Systems and Land Use | not currently a key stakeholder                                                                                                |
| 2 | Animal Health    | Production Systems and Land Use | in livestock sector animal health and welfare can drive wider sustainability - should be central to conversation               |
| 2 | Other            | Production Systems and Land Use | increased attacks on livestock + reduction in biodiversity due to cat predation                                                |
| 1 | Social Structure | Society and Diet                | growing global urbanisation                                                                                                    |
| 1 | Social Structure | Society and Diet                | succession                                                                                                                     |
| 1 | Social Structure | Society and Diet                | continued/increased polarisation or finding common ground                                                                      |
| 1 | Social Structure | Society and Diet                | poverty - forcing people to buy cheap (high environmental impact) food                                                         |
| 1 | Social Structure | Society and Diet                | access to food                                                                                                                 |
| 1 | Social Structure | Society and Diet                | subsistence farming not viable in marginal areas = unjust decline                                                              |
| 1 | Social Structure | Society and Diet                | opportunities to enter farming                                                                                                 |
| 2 | Social Structure | Society and Diet                | good food choices are a privilege - inequality is linked to poor health                                                        |
| 2 | Social Structure | Society and Diet                | an effective social security system and living wage                                                                            |
| 2 | Social Structure | Society and Diet                | impacts of food system change in line with National Food Strategy or Good Food Nation Act                                      |
| 2 | Social Structure | Society and Diet                | lack urban-rural connections                                                                                                   |
| 2 | Social Structure | Society and Diet                | lack of access to good diet for socio-economically deprived                                                                    |
| 2 | Social Structure | Society and Diet                | food chain inequality - retailers, farmers, society                                                                            |
| 1 | Public Attitudes | Society and Diet                | public becoming more interested in the provenance of their food                                                                |
| 1 | Public Attitudes | Society and Diet                | growing awareness of climate change                                                                                            |
| 1 | Public Attitudes | Society and Diet                | increasing influence of single-issue lobby groups over public policy                                                           |
| 1 | Public Attitudes | Society and Diet                | changing attitudes to animals and uses of them                                                                                 |

|   |                  |                  |                                                                                                                     |
|---|------------------|------------------|---------------------------------------------------------------------------------------------------------------------|
| 1 | Public Attitudes | Society and Diet | culture war politics e.g. anti-Net Zero agenda                                                                      |
| 1 | Public Attitudes | Society and Diet | consumers choosing chicken over red meat for health/climate                                                         |
| 1 | Public Attitudes | Society and Diet | influencers (social media)                                                                                          |
| 1 | Public Attitudes | Society and Diet | consumer preferences/pressures                                                                                      |
| 1 | Public Attitudes | Society and Diet | misinformation from corporates                                                                                      |
| 1 | Public Attitudes | Society and Diet | consumer demand                                                                                                     |
| 1 | Public Attitudes | Society and Diet | societal value of farming                                                                                           |
| 1 | Public Attitudes | Society and Diet | perception that don't need farmers in 50 years                                                                      |
| 2 | Public Attitudes | Society and Diet | politicisation of Bovaer                                                                                            |
| 2 | Public Attitudes | Society and Diet | ignorance of (largely imported) meat in frozen products                                                             |
| 2 | Public Attitudes | Society and Diet | different consumer pressures for sheep and cattle                                                                   |
| 2 | Public Attitudes | Society and Diet | wilful ignorance from consumers                                                                                     |
| 2 | Public Attitudes | Society and Diet | animal activist protests show lack of knowledge about farm practices                                                |
| 2 | Public Attitudes | Society and Diet | frustration around anti-meat movement - lack of understanding of the place of livestock in regenerative agriculture |
| 2 | Public Attitudes | Society and Diet | social licence - misinformation/lack of information                                                                 |
| 2 | Other            | Society and Diet | massive increase in pet ownership - driving increased demand for meat                                               |
| 1 | Other            | Society and Diet | alternative proteins changing options for people                                                                    |
| 1 | Human Health     | Society and Diet | emergence of individualised diets related to personal healthcare                                                    |
| 1 | Human Health     | Society and Diet | increased focus on One Health                                                                                       |
| 1 | Human Health     | Society and Diet | diabetes etc., grant policy                                                                                         |
| 1 | Human Health     | Society and Diet | look at budgets/headspace to focus on prevention                                                                    |
| 1 | Human Health     | Society and Diet | food as medicine, medicine as food                                                                                  |
| 1 | Human Health     | Society and Diet | climate change; deregulation (forced, no control); people power, return control to people                           |
| 1 | Human Health     | Society and Diet | health advice                                                                                                       |
| 1 | Human Health     | Society and Diet | health/life expectancy                                                                                              |
| 2 | Human Health     | Society and Diet | 100% pasture-fed products better for human health                                                                   |
| 2 | Human Health     | Society and Diet | pasture-fed has lower emissions when nutrition content is part of LCA                                               |
| 2 | Human Health     | Society and Diet | research to demonstrate superior nutrient density and reward producers for it                                       |
| 2 | Human Health     | Society and Diet | biodiversity buffer zones to protect from zoonoses and prevent future pandemics                                     |

|   |              |                  |                                                                                            |
|---|--------------|------------------|--------------------------------------------------------------------------------------------|
| 2 | Human Health | Society and Diet | mental health - farmer anxiety, in a defensive position                                    |
| 2 | Human Health | Society and Diet | bad diet leads to health issues and pressure on the NHS                                    |
| 1 | Food         | Society and Diet | increasing concentration of ownership of food system into fewer hands                      |
| 1 | Food         | Society and Diet | supply chain disruption globally                                                           |
| 1 | Food         | Society and Diet | growing population leading to growing demand                                               |
| 1 | Food         | Society and Diet | affordability of food                                                                      |
| 1 | Food         | Society and Diet | supermarket power/influence                                                                |
| 1 | Food         | Society and Diet | supermarkets versus other retail types                                                     |
| 1 | Food         | Society and Diet | measuring nutrient density of food accurately and as open source to the public             |
| 1 | Food         | Society and Diet | length of supply chains                                                                    |
| 1 | Food         | Society and Diet | organisational processing infrastructure (retaining value)                                 |
| 1 | Food         | Society and Diet | supply chain chokepoints - internationally more resilient and secure domestic production   |
| 1 | Food         | Society and Diet | relative cost - (meat?) alternatives                                                       |
| 1 | Food         | Society and Diet | dietary change - cost, health, availability                                                |
| 1 | Food         | Society and Diet | awareness of detrimental effects of UPF                                                    |
| 1 | Food         | Society and Diet | bad modelling                                                                              |
| 1 | Food         | Society and Diet | food labelling/traffic lights                                                              |
| 1 | Food         | Society and Diet | food environment/planning retailer layout                                                  |
| 1 | Food         | Society and Diet | food availability                                                                          |
| 1 | Food         | Society and Diet | consumer time management                                                                   |
| 1 | Food         | Society and Diet | supermarkets very powerful                                                                 |
| 1 | Food         | Society and Diet | disconnect between food and farming                                                        |
| 2 | Food         | Society and Diet | low-income families cannot act on concerns about low-welfare meat                          |
| 2 | Food         | Society and Diet | world food shortages                                                                       |
| 2 | Food         | Society and Diet | stability and transparency in Halal sheep markets - pro-pasture and concerned with welfare |
| 2 | Food         | Society and Diet | on farm system change - whole supply chain and transparency                                |
| 2 | Food         | Society and Diet | providing consumption choice for all household budgets                                     |
| 2 | Food         | Society and Diet | lack of contracts                                                                          |
| 2 | Food         | Society and Diet | managing balance between supply and demand for all                                         |
| 2 | Food         | Society and Diet | food waste is equivalent to 15 billion head of livestock a year                            |

|   |           |                  |                                                                                        |
|---|-----------|------------------|----------------------------------------------------------------------------------------|
| 2 | Food      | Society and Diet | nutritional value and/or density                                                       |
| 2 | Food      | Society and Diet | climate change 35-65% reduction target by 2025 - will consumers respond?               |
| 1 | Education | Society and Diet | rising levels of further education but corresponding reduction in vocational education |
| 1 | Education | Society and Diet | increased (or decreased?) government funding for R&D within food systems               |
| 1 | Education | Society and Diet | behaviour change (difficulty of)                                                       |
| 1 | Education | Society and Diet | education in agroecological application of livestock to landscapes                     |
| 1 | Education | Society and Diet | availability of suitably qualified persons (SQPs) (e.g. vets) to support and deliver   |
| 1 | Education | Society and Diet | research                                                                               |
| 1 | Education | Society and Diet | tertiary education                                                                     |
| 1 | Education | Society and Diet | who teaches the people                                                                 |
| 1 | Education | Society and Diet | global food commoditisation                                                            |
| 2 | Education | Society and Diet | funding for R&D often linked to commercialisation and so extractive                    |
| 2 | Education | Society and Diet | slow research cycles -farmers usually think 7 to 10 years ahead                        |
| 2 | Education | Society and Diet | more education on food systems                                                         |
| 2 | Education | Society and Diet | reinstate food A Level                                                                 |
| 2 | Education | Society and Diet | raise prestige of food work                                                            |
| 2 | Education | Society and Diet | more farmer discussion groups to instigate positive change                             |
| 2 | Education | Society and Diet | more food and farming education                                                        |
| 2 | Education | Society and Diet | misinformation is rampant                                                              |
| 2 | Education | Society and Diet | lack of effective Agricultural Knowledge and Innovation Systems to support change      |
| 2 | Education | Society and Diet | lack of education on ecosystems services, soil health etc                              |
| 2 | Education | Society and Diet | lack of understanding of nature - put into curriculum earlier                          |
| 2 | Education | Society and Diet | capture indigenous knowledge - wealth of knowledge being lost                          |
| 2 | Education | Society and Diet | farm advisory support (used to have ADAS)                                              |
| 2 | Education | Society and Diet | lack of farming/food system education in national curriculum                           |
| 2 | Education | Society and Diet | agricultural college curriculum                                                        |
| 2 | Education | Society and Diet | lack of farmer understanding of switch from productivity to public goods               |

|   |            |                  |                                                                                                                   |
|---|------------|------------------|-------------------------------------------------------------------------------------------------------------------|
| 2 | Education  | Society and Diet | farmer knowledge exchange                                                                                         |
| 2 | Education  | Society and Diet | land stewardship                                                                                                  |
| 2 | Education  | Society and Diet | skill set change from livestock management to quite complex ecological knowledge                                  |
| 1 | Demography | Society and Diet | reduction in domestic workforce for farming and food processing                                                   |
| 1 | Demography | Society and Diet | changes to predominant religions, changing meat consumption patterns                                              |
| 1 | Demography | Society and Diet | religion and how it shapes food choices                                                                           |
| 1 | Demography | Society and Diet | assume approximately static                                                                                       |
| 1 | Demography | Society and Diet | rural depopulation would detract from active workforce for food systems                                           |
| 1 | Demography | Society and Diet | ageing population of farming/rural sectors                                                                        |
| 1 | Demography | Society and Diet | labour - skills and education - livestock                                                                         |
| 1 | Demography | Society and Diet | rural de-population - remote rural                                                                                |
| 1 | Demography | Society and Diet | people, farmers, labour, new entrants                                                                             |
| 2 | Demography | Society and Diet | Separation of people from land - opportunity for greenwash                                                        |
| 2 | Demography | Society and Diet | ageing farming population leads to problems with succession                                                       |
| 2 | Demography | Society and Diet | average age of farmers increasing                                                                                 |
| 2 | Demography | Society and Diet | lesson to learn from elsewhere                                                                                    |
| 2 | Demography | Society and Diet | loss of livestock skills - knowledge held by older generations not being passed on as too few coming into farming |

**Table 2 SSP1 Mapping**

| <i>Driver Category</i>                       | <i>Drivers</i>                                       | <i>Importance (1 to 5), highest to lowest</i> | <i>Descriptive range of possible outcomes (1-5)</i>                                         | <i>Possible outcome for your SSP</i> | <i>Outcome (based on outcome score and range, incorporating comments/notes)</i> | <i>Comments</i> |
|----------------------------------------------|------------------------------------------------------|-----------------------------------------------|---------------------------------------------------------------------------------------------|--------------------------------------|---------------------------------------------------------------------------------|-----------------|
| UK/Devolved Government Policy and Governance | Environmental legislation for livestock sector       | 5                                             | Low regulation - High regulation                                                            | 5                                    | High regulation and environmental legislation for livestock sector              |                 |
| UK/Devolved Government Policy and Governance | Post-Brexit Agricultural subsidies/Payment Schemes   | 5                                             | Payment schemes fail - Payment schemes effectively reward sustainable farming               | 5                                    | Payment schemes effectively reward sustainable farming                          |                 |
| UK/Devolved Government Policy and Governance | Public Spending on Agriculture and Rural Development | 5                                             | Reduced public investment - Increased targeted investment in rural economies and innovation | 5                                    | Increased targeted investment in rural economies and innovation                 |                 |

|                                              |                                                                                                  |   |                                                                                                                                    |   |                                                                                     |
|----------------------------------------------|--------------------------------------------------------------------------------------------------|---|------------------------------------------------------------------------------------------------------------------------------------|---|-------------------------------------------------------------------------------------|
| UK/Devolved Government Policy and Governance | (In)consistency in Government Policy                                                             | 5 | Policy inconsistency created confusion and challenges for farmers - A consistent approach provides stability and a clear direction | 5 | A consistent approach to government policy provides stability and a clear direction |
| UK/Devolved Government Policy and Governance | Regulation of Agrochemicals                                                                      | 5 | Low regulation - High regulation                                                                                                   | 5 | High regulation of agrochemicals                                                    |
| UK/Devolved Government Policy and Governance | Devolution in Agricultural Policy                                                                | 5 | Distinct policies in devolved nations - Consistent UK-wide approach                                                                | 5 | Consistent UK-wide approach to policy and governance                                |
| Natural Resources                            | Biodiversity Loss                                                                                | 5 | Declining species - Enhanced biodiversity                                                                                          | 5 | Enhanced biodiversity                                                               |
| Natural Resources                            | Water Resource Availability                                                                      | 5 | Scarcity impacts agricultural production - Effective water management leads to sustainable farming                                 | 5 | Effective water management leads to sustainable farming                             |
| Natural Resources                            | Land Availability                                                                                | 5 | Limited land availability constrains production and expansion - Ample land resources support sustainable practices                 | 5 | Ample land resources support sustainable practices                                  |
| Natural Resources                            | Soil Health                                                                                      | 5 | Declining soil quality impacts fodder yield for livestock - Improved soil health enhances fodder production for livestock          | 5 | Improved soil health enhances fodder production for livestock                       |
| Natural Resources                            | Climate Resilience                                                                               | 5 | Lack of strategies leads to vulnerabilities - Robust strategies enhance resilience to climate impacts                              | 5 | Robust strategies enhance resilience to climate impacts                             |
| Food                                         | Changing Dietary Preferences                                                                     | 5 | Increased meat consumption - Major shift towards meat alternatives and decline in meat consumption                                 | 4 | Large shift towards meat alternatives and decline in meat consumption               |
| Energy                                       | Renewable Energy Adoption                                                                        | 5 | Low adoption of renewable energy - High investment in renewable energy                                                             | 5 | High investment in renewable energy                                                 |
| Animal Health                                | Animal Welfare Regulations                                                                       | 5 | Minimal welfare improvements - Strict enforcement leads to significant welfare enhancements                                        | 5 | Strict enforcement leads to significant welfare enhancements                        |
| Economic Development                         | Rural Economics                                                                                  | 4 | Lack of investment in rural infrastructure - Targeted investment in rural areas                                                    | 5 | Targeted investment in rural areas                                                  |
| Animal Health                                | Zoonotic Disease Outbreaks                                                                       | 4 | Frequent outbreaks disrupt livestock production - Rare outbreaks managed effectively with robust biosecurity                       | 5 | Rare outbreaks managed effectively with robust biosecurity                          |
| International Relations                      | Level Playing Field Across the Globe (e.g. fair competition and equal standards in global trade) | 3 | Uneven standards put UK farmers at a competitive disadvantage - Global alignment ensures fair competition and market access        | 5 | Global alignment in trade standards ensures fair competition and market access      |

|                           |                                         |   |                                                                                                                                              |       |                                                                           |                                       |
|---------------------------|-----------------------------------------|---|----------------------------------------------------------------------------------------------------------------------------------------------|-------|---------------------------------------------------------------------------|---------------------------------------|
| Economic Development      | Critical Mass of Livestock Industries   | 3 | A shock disrupts allied professions leading to industry collapse - Strong interdependence sustains the industry through challenges           | 5     | Strong interdependence sustains the livestock industry through challenges |                                       |
| Food                      | Affordability of Food                   | 3 | Unaffordable - Affordable                                                                                                                    | 5     | Affordable food                                                           |                                       |
| Transport & Mobility      | Transport Costs for Livestock Producers | 3 | Low transport costs - High costs impact business viability                                                                                   | 3     | Medium transport costs                                                    |                                       |
| Transport & Mobility      | Transport Infrastructure Investment     | 3 | Poor infrastructure limits efficiency - Enhanced transport networks strengthen supply chains                                                 | 3     | Some progress in transport infrastructure improves supply chains          |                                       |
| International Relations   | Trade Agreement/Barriers                | 2 | Protectionism and trade barriers stifle exports and increase costs - Open trade agreements reduce barriers and enhance market access         | 5     | Open trade agreements reduce barriers and enhance market access           |                                       |
| International Relations   | Geopolitical Upheaval and Instability   | 2 | Impact on food security due to global conflicts - Strong international alliances boosting trade                                              | 5     | Strong international alliances boosting trade                             |                                       |
| Food                      | Length of Supply Chains                 | 2 | Short supply chains - Long supply chains                                                                                                     | 1     | Short supply chains                                                       | think scale is the wrong way round    |
| Energy                    | Energy Costs                            | 2 | Rising energy costs increase production expenses - Stable energy costs reducing pressure on costs                                            | 5     | Stable energy costs reducing pressure on costs                            |                                       |
| Human Health              | Diet-Related Diseases                   | 2 | Rising prevalence of diet-related disease due to high consumption of red and processed meat - Healthier diets improve public health outcomes | 5     | Healthier diets improve public health outcomes                            |                                       |
| Response to Global Shocks | Climate Change Impacts                  | 2 | Severe disruption from frequent extreme weather and climatic changes - Mild impacts, limited extremes                                        | 5 (?) | Mild impacts, limited extremes                                            |                                       |
| Response to Global Shocks | Pandemic Preparedness                   | 2 | Inadequate response to global health crises - Robust systems in place for quick recovery                                                     | 5     | Robust systems in place for quick recovery                                |                                       |
| Economic Development      | Producer Profitability                  | 1 | Low profitability - High profitability                                                                                                       | 3     | Mid profitability                                                         |                                       |
| Economic Development      | Poverty Levels                          | 1 | Low levels of poverty - High levels of poverty                                                                                               | 1     | Low levels of poverty                                                     | but we think scale is wrong way round |
| Food                      | Supermarket Power/Influence             | 1 | High influence - Low influence                                                                                                               | 5     | Low power/influence of supermarkets                                       |                                       |
| Food                      | Food Security                           | 1 | High levels of food insecurity among vulnerable populations - Improved food security through diversified supply chains                       | 5     | Improved food security through diversified supply chains                  |                                       |
| Energy                    | Green Energy Subsidies                  | 1 | Low incentives for renewable investments - High subsidies encourage development of green energy                                              | 5     | High subsidies encourage development of green energy                      | important during the transition       |

|                           |                                               |   |                                                                                                                                               |                             |                                                                    |
|---------------------------|-----------------------------------------------|---|-----------------------------------------------------------------------------------------------------------------------------------------------|-----------------------------|--------------------------------------------------------------------|
| Human Health              | Access to Healthcare                          | 1 | Disparities in healthcare access - Equal access to quality healthcare for all                                                                 | 5                           | Equal access to quality healthcare for all                         |
| Animal Health             | Antimicrobial Resistance (AMR)                | 1 | Rapid rise in AMR due to overuse of antibiotics in livestock farming - AMR controlled through alternative practices and strict regulation     | 5                           | AMR controlled through alternative practices and strict regulation |
| Response to Global Shocks | Price Volatility                              | 1 | High price volatility from market disruptions - Stable prices with minimal fluctuations                                                       | 5                           | Stable prices with minimal fluctuations in response to shocks      |
| International Relations   | Global Supply Chain Resilience                |   | Frequent disruptions - Resilient diversified supply chains                                                                                    | 4 (localised supply chains) | Localised supply chains                                            |
| International Relations   | International Trade Standards                 |   | Divergence from international welfare and food standards - Alignment with international standards                                             | 5                           | Alignment with international standards                             |
| Economic Development      | Intra-UK Trade/Internal Market Act            |   | No barrier to trade between nations - Major obstacles due to differing policies                                                               |                             |                                                                    |
| Economic Development      | Employment                                    |   | Decline in agricultural jobs - Job growth and new opportunities                                                                               |                             |                                                                    |
| Social Structure          | Rural-Urban Income Inequality                 |   | Rising rural-urban income gap - Balanced economic development reducing inequalities                                                           |                             |                                                                    |
| Social Structure          | Balance of Small/Large Farms                  |   | Smaller farms squeezed out by larger farms - Balanced system                                                                                  |                             |                                                                    |
| Social Structure          | Concentration of Ownership in Food Production |   | Low concentration - High concentration                                                                                                        |                             |                                                                    |
| Social Structure          | Access to Services                            |   | Limited access to healthcare, education and social services in rural areas - Improved access to services for all communities                  |                             |                                                                    |
| Demography                | Ageing Farming Population                     |   | Fewer young farmers, labour shortages - Increase in young farmers entering the sector                                                         |                             |                                                                    |
| Demography                | Population Growth                             |   | Strain on resources and infrastructure - Balanced growth supports rural and urban areas                                                       |                             |                                                                    |
| Public Attitudes          | Consumer Perception of Livestock Farming      |   | Increased opposition to livestock farming leads to decreased consumption - Increased support for livestock farming drives demand for products |                             |                                                                    |
| Public Attitudes          | Media Influence                               |   | Minimal impact of media on livestock consumption choices - Significant influence of media                                                     |                             |                                                                    |

|                  |                                  |                                                                                                                                                        |
|------------------|----------------------------------|--------------------------------------------------------------------------------------------------------------------------------------------------------|
| Public Attitudes | Messaging Targeting the Public   | Minimal public messaging - Lots of campaigns influencing perspectives                                                                                  |
| Public Attitudes | Culture Around Futures           | Culture war - Harmonised perspectives                                                                                                                  |
| Public Attitudes | Sustainability Attitudes         | Limited concern for sustainable livestock farming - Strong demand for sustainable livestock practices                                                  |
| Public Attitudes | Willingness to Pay for Welfare   | Unwillingness to pay extra for high animal welfare - Willingness to pay a premium for high animal welfare standards                                    |
| Technology       | Genetics/Gene Editing            | Conservative genetic improvements through selective breeding - Breakthrough innovations in gene editing leading to disease-resistant, high-yield stock |
| Technology       | Alternative Protein Technologies | Niche market with minimal impact - Rapid growth disrupting conventional livestock markets                                                              |
| Technology       | Precision Livestock Farming      | Slow adoption due to high costs/resistance to change - Widespread implementation                                                                       |
| Education        | Public R&D Funding               | Insufficient funding hinders R&D innovation - Strong funding drives advancement in agri-food innovation                                                |
| Education        | Agri-Food Education and Training | Lack of training restricts innovation - Quality education promotes widespread innovation                                                               |
| Education        | Climate Literacy                 | Limited understanding of climate interactions with agriculture - High levels of climate literacy drive sustainable practices                           |

**Table 3 SSP2 Mapping**

| <i>Driver Category</i>                       | <i>Drivers</i>                                 | <i>Importance (1 to 5), highest to lowest</i> | <i>Descriptive range of possible outcomes (1-5)</i>                                                                                  | <i>Possible outcome for your SSP</i> | <i>Outcome (based on outcome score and range, incorporating comments/notes)</i>                                                                                                                                                                                                                                                                                    | <i>Comments</i>                                |
|----------------------------------------------|------------------------------------------------|-----------------------------------------------|--------------------------------------------------------------------------------------------------------------------------------------|--------------------------------------|--------------------------------------------------------------------------------------------------------------------------------------------------------------------------------------------------------------------------------------------------------------------------------------------------------------------------------------------------------------------|------------------------------------------------|
| UK/Devolved Government Policy and Governance | Environmental legislation for livestock sector | 5                                             | Low regulation - High regulation                                                                                                     | 1                                    | Low regulation and environmental legislation for livestock sector                                                                                                                                                                                                                                                                                                  | Difference between impact and importance       |
| UK/Devolved Government Policy and Governance | Devolution in Agricultural Policy              | 5                                             | Distinct policies in devolved nations - Consistent UK-wide approach                                                                  | 1                                    | Divergent policies in devolved nations. Scottish devolved policy buffers in short-term.                                                                                                                                                                                                                                                                            | Scottish devolved policy buffers in short-term |
| International Relations                      | Global Supply Chain Resilience                 | 5                                             | Frequent disruptions - Resilient diversified supply chains                                                                           | 2                                    | Low global supply chain resilience - With increased international tensions and trade barriers, supply chains become less diversified and more reliant on domestic resources                                                                                                                                                                                        |                                                |
| International Relations                      | International Trade Standards                  | 5                                             | Divergence from international welfare and food standards - Alignment with international standards                                    | 2                                    | Divergence from international standards - The UK lifts environmental and food safety regulations to focus on domestic production and economic survival. This divergence from international welfare and food standards creates barriers to alignment, isolating the UK from global trade systems and leading to competitive disadvantages in international markets. |                                                |
| International Relations                      | Trade Agreement/Barriers                       | 5                                             | Protectionism and trade barriers stifle exports and increase costs - Open trade agreements reduce barriers and enhance market access | 1                                    | Protectionism and trade barriers stifle exports and increase costs due to rising international tensions and a shift towards economic self-sufficiency. These protectionist policies, coupled with increased border controls and reduced                                                                                                                            |                                                |

|                         |                                                                                                  |   |                                                                                                                              |   |                                                                                                                                                                                                                                                                                                                                                                                              |                                                                                                                                                                  |
|-------------------------|--------------------------------------------------------------------------------------------------|---|------------------------------------------------------------------------------------------------------------------------------|---|----------------------------------------------------------------------------------------------------------------------------------------------------------------------------------------------------------------------------------------------------------------------------------------------------------------------------------------------------------------------------------------------|------------------------------------------------------------------------------------------------------------------------------------------------------------------|
|                         |                                                                                                  |   |                                                                                                                              |   | integration with international markets, exacerbate trade barriers, limiting export opportunities and driving up costs.                                                                                                                                                                                                                                                                       |                                                                                                                                                                  |
| International Relations | Level Playing Field Across the Globe (e.g. fair competition and equal standards in global trade) | 5 | Uneven standards put UK farmers at a competitive disadvantage - Global alignment ensures fair competition and market access  | 1 | Uneven standards put UK farmers at a competitive disadvantage. Divergence in agricultural subsidies and trade policies across the four UK nations, combined with lowered environmental and food safety standards, undermines fair competition. UK farmers face uneven playing fields domestically and internationally, reducing competitiveness and exacerbating socio-economic disparities. |                                                                                                                                                                  |
| Natural Resources       | Biodiversity Loss                                                                                | 5 | Declining species - Enhanced biodiversity                                                                                    | 1 | Declining species - In this theory it is rational to protect environment to ensure domestic food production is sustainable but the likeliness of this is low which is self-defeating                                                                                                                                                                                                         | In this theory it is rational to protect environment to ensure domestic food production is sustainable but the likeliness of this is low which is self-defeating |
| Natural Resources       | Water Resource Availability                                                                      | 5 | Scarcity impacts agricultural production - Effective water management leads to sustainable farming                           | 1 | Scarcity impacts agricultural production                                                                                                                                                                                                                                                                                                                                                     |                                                                                                                                                                  |
| Natural Resources       | Land Availability                                                                                | 5 | Limited land availability constrains production and expansion- Ample land resources support growth and sustainable practices | 1 | Limited land availability constrains production and expansion                                                                                                                                                                                                                                                                                                                                |                                                                                                                                                                  |
| Natural Resources       | Soil Health                                                                                      | 5 | Declining soil quality impacts fodder yield for livestock - Improved soil health enhances fodder production for livestock    | 1 | Declining soil quality impacts fodder yield for livestock                                                                                                                                                                                                                                                                                                                                    |                                                                                                                                                                  |

|                                              |                                                      |   |                                                                                                                                           |   |                                                                                                       |                                      |
|----------------------------------------------|------------------------------------------------------|---|-------------------------------------------------------------------------------------------------------------------------------------------|---|-------------------------------------------------------------------------------------------------------|--------------------------------------|
| Natural Resources                            | Climate Resilience                                   | 5 | Lack of strategies leads to vulnerabilities - Robust strategies enhance resilience to climate impacts                                     | 1 | Lack of strategies leads to vulnerabilities                                                           |                                      |
| Animal Health                                | Zoonotic Disease Outbreaks                           | 5 | Frequent outbreaks disrupt livestock production - Rare outbreaks managed effectively with robust biosecurity                              | 1 | Frequent zoonotic disease outbreaks disrupt livestock production with greater impact - less contained | with greater impact - less contained |
| Response to Global Shocks                    | Climate Change Impacts                               | 5 | Severe disruption from frequent extreme weather and climatic changes - Mild impacts, limited extremes                                     | 1 | Severe disruption from frequent extreme weather and climatic changes                                  | important                            |
| Response to Global Shocks                    | Price Volatility                                     | 5 | High price volatility from market disruptions - Stable prices with minimal fluctuations                                                   | 1 | High price volatility from market disruptions                                                         |                                      |
| Response to Global Shocks                    | Pandemic Preparedness                                | 5 | Inadequate response to global health crises - Robust systems in place for quick recovery                                                  | 1 | Inadequate response to global health crises                                                           |                                      |
| UK/Devolved Government Policy and Governance | (In)consistency in Government Policy                 | 4 | Policy inconsistency created confusion and challenges for farmers- A consistent approach provides stability and a clear direction         | 1 | Policy inconsistency created confusion and challenges for farmers                                     |                                      |
| Technology                                   | Alternative Protein Technologies                     | 3 | Niche market with minimal impact - Rapid growth disrupting conventional livestock markets                                                 |   |                                                                                                       |                                      |
| Human Health                                 | Access to Healthcare                                 | 2 | Disparities in healthcare access - Equal access to quality healthcare for all                                                             |   |                                                                                                       |                                      |
| Animal Health                                | Antimicrobial Resistance (AMR)                       | 2 | Rapid rise in AMR due to overuse of antibiotics in livestock farming - AMR controlled through alternative practices and strict regulation | 1 | Rapid rise in AMR due to overuse of antibiotics in livestock farming                                  |                                      |
| Animal Health                                | Animal Welfare Regulations                           | 2 | Minimal welfare improvements - Strict enforcement leads to significant welfare enhancements                                               | 1 | Minimal animal welfare improvements                                                                   |                                      |
| UK/Devolved Government Policy and Governance | Post-Brexit Agricultural subsidies/Payment Schemes   | 1 | Payment schemes fail - Payment schemes effectively reward sustainable farming                                                             |   |                                                                                                       |                                      |
| UK/Devolved Government Policy and Governance | Public Spending on Agriculture and Rural Development | 1 | Reduced public investment - Increased targeted investment in rural economies and innovation                                               | 1 | Reduced public investment                                                                             |                                      |
| UK/Devolved Government Policy and Governance | Regulation of Agrochemicals                          | 1 | Low regulation - High regulation                                                                                                          | 1 | Low regulation of agrochemicals                                                                       |                                      |
| Public Attitudes                             | Media Influence                                      | 1 | Minimal impact of media on livestock consumption choices - Significant influence of media                                                 |   |                                                                                                       |                                      |

|                         |                                               |   |                                                                                                                                              |   |                                                                                             |
|-------------------------|-----------------------------------------------|---|----------------------------------------------------------------------------------------------------------------------------------------------|---|---------------------------------------------------------------------------------------------|
| Education               | Public R&D Funding                            | 1 | Insufficient funding hinders R&D innovation - Strong funding drives advancement in agri-food innovation                                      | 1 | Insufficient funding hinders R&D innovation                                                 |
| Education               | Agri-Food Education and Training              | 1 | Lack of training restricts innovation - Quality education promotes widespread innovation                                                     | 1 | Lack of training restricts innovation                                                       |
| Education               | Climate Literacy                              | 1 | Limited understanding of climate interactions with agriculture - High levels of climate literacy drive sustainable practices                 | 1 | Limited understanding of climate interactions with agriculture                              |
| Human Health            | Diet-Related Diseases                         | 1 | Rising prevalence of diet-related disease due to high consumption of red and processed meat - Healthier diets improve public health outcomes | 1 | Rising prevalence of diet-related disease due to high consumption of red and processed meat |
| International Relations | Geopolitical Upheaval and Instability         |   | Impact on food security due to global conflicts - Strong international alliances boosting trade                                              |   |                                                                                             |
| Economic Development    | Rural Economics                               |   | Lack of investment in rural infrastructure - Targeted investment in rural areas                                                              |   |                                                                                             |
| Economic Development    | Producer Profitability                        |   | Low profitability - High profitability                                                                                                       |   |                                                                                             |
| Economic Development    | Critical Mass of Livestock Industries         |   | A shock disrupts allied professions leading to industry collapse - Strong interdependence sustains the industry through challenges           |   |                                                                                             |
| Economic Development    | Poverty Levels                                |   | Low levels of poverty - High levels of poverty                                                                                               |   |                                                                                             |
| Economic Development    | Intra-UK Trade/Internal Market Act            |   | No barrier to trade between nations - Major obstacles due to differing policies                                                              |   |                                                                                             |
| Economic Development    | Employment                                    |   | Decline in agricultural jobs - Job growth and new opportunities                                                                              |   |                                                                                             |
| Social Structure        | Rural-Urban Income Inequality                 |   | Rising rural-urban income gap - Balanced economic development reducing inequalities                                                          |   |                                                                                             |
| Social Structure        | Balance of Small/Large Farms                  |   | Smaller farms squeezed out by larger farms - Balanced system                                                                                 |   |                                                                                             |
| Social Structure        | Concentration of Ownership in Food Production |   | Low concentration - High concentration                                                                                                       |   |                                                                                             |
| Social Structure        | Access to Services                            |   | Limited access to healthcare, education and social services in rural areas - Improved access to services for all communities                 |   |                                                                                             |
| Demography              | Ageing Farming Population                     |   | Fewer young farmers, labour shortages - Increase in young farmers entering the sector                                                        |   |                                                                                             |
| Demography              | Population Growth                             |   | Strain on resources and infrastructure - Balanced growth supports rural and urban areas                                                      |   |                                                                                             |

|                  |                                          |                                                                                                                                                        |                                    |
|------------------|------------------------------------------|--------------------------------------------------------------------------------------------------------------------------------------------------------|------------------------------------|
| Public Attitudes | Consumer Perception of Livestock Farming | Increased opposition to livestock farming leads to decreased consumption - Increased support for livestock farming drives demand for products          |                                    |
| Public Attitudes | Messaging Targeting the Public           | Minimal public messaging - Lots of campaigns influencing perspectives                                                                                  |                                    |
| Public Attitudes | Culture Around Futures                   | Culture war - Harmonised perspectives                                                                                                                  |                                    |
| Public Attitudes | Sustainability Attitudes                 | Limited concern for sustainable livestock farming - Strong demand for sustainable livestock practices                                                  |                                    |
| Public Attitudes | Willingness to Pay for Welfare           | Unwillingness to pay extra for high animal welfare - Willingness to pay a premium for high animal welfare standards                                    |                                    |
| Technology       | Genetics/Gene Editing                    | Conservative genetic improvements through selective breeding - Breakthrough innovations in gene editing leading to disease-resistant, high-yield stock |                                    |
| Technology       | Precision Livestock Farming              | Slow adoption due to high costs/resistance to change - Widespread implementation                                                                       |                                    |
| Food             | Changing Dietary Preferences             | Increased meat consumption - Major shift towards meat alternatives and decline in meat consumption                                                     | Diets at the mercy of free markets |
| Food             | Affordability of Food                    | Unaffordable - Affordable                                                                                                                              |                                    |
| Food             | Length of Supply Chains                  | Short supply chains - Long supply chains                                                                                                               |                                    |
| Food             | Supermarket Power/Influence              | High influence - Low influence                                                                                                                         |                                    |
| Food             | Food Security                            | High levels of food insecurity among vulnerable populations - Improved food security through diversified supply chains                                 |                                    |
| Energy           | Energy Costs                             | Rising energy costs increase production expenses - Stable energy costs reducing pressure on costs                                                      |                                    |
| Energy           | Green Energy Subsidies                   | Low incentives for renewable investments - High subsidies encourage development of green energy                                                        |                                    |
| Energy           | Renewable Energy Adoption                | Low adoption of renewable energy - High investment in renewable energy                                                                                 |                                    |

|                      |                                         |                                                                                              |
|----------------------|-----------------------------------------|----------------------------------------------------------------------------------------------|
| Transport & Mobility | Transport Costs for Livestock Producers | Low transport costs - High costs impact business viability                                   |
| Transport & Mobility | Transport Infrastructure Investment     | Poor infrastructure limits efficiency - Enhanced transport networks strengthen supply chains |

**Table 4 SSP3 Mapping**

| <i>Driver Category</i>                       | <i>Drivers</i>                                 | <i>Importance (1 to 5), highest to lowest</i> | <i>Descriptive range of possible outcomes (1-5)</i>                                                                                  | <i>Possible outcome for your SSP</i> | <i>Outcome (based on outcome score and range, incorporating comments/notes)</i>                                                                                                                                                                                                                                                                                    | <i>Comments</i>                                |
|----------------------------------------------|------------------------------------------------|-----------------------------------------------|--------------------------------------------------------------------------------------------------------------------------------------|--------------------------------------|--------------------------------------------------------------------------------------------------------------------------------------------------------------------------------------------------------------------------------------------------------------------------------------------------------------------------------------------------------------------|------------------------------------------------|
| UK/Devolved Government Policy and Governance | Environmental legislation for livestock sector | 5                                             | Low regulation - High regulation                                                                                                     | 1                                    | Low regulation and environmental legislation for livestock sector                                                                                                                                                                                                                                                                                                  | Difference between impact and importance       |
| UK/Devolved Government Policy and Governance | Devolution in Agricultural Policy              | 5                                             | Distinct policies in devolved nations - Consistent UK-wide approach                                                                  | 1                                    | Divergent policies in devolved nations. Scottish devolved policy buffers in short-term.                                                                                                                                                                                                                                                                            | Scottish devolved policy buffers in short-term |
| International Relations                      | Global Supply Chain Resilience                 | 5                                             | Frequent disruptions - Resilient diversified supply chains                                                                           | 2                                    | Low global supply chain resilience - With increased international tensions and trade barriers, supply chains become less diversified and more reliant on domestic resources                                                                                                                                                                                        |                                                |
| International Relations                      | International Trade Standards                  | 5                                             | Divergence from international welfare and food standards - Alignment with international standards                                    | 2                                    | Divergence from international standards - The UK lifts environmental and food safety regulations to focus on domestic production and economic survival. This divergence from international welfare and food standards creates barriers to alignment, isolating the UK from global trade systems and leading to competitive disadvantages in international markets. |                                                |
| International Relations                      | Trade Agreement/Barriers                       | 5                                             | Protectionism and trade barriers stifle exports and increase costs - Open trade agreements reduce barriers and enhance market access | 1                                    | Protectionism and trade barriers stifle exports and increase costs due to rising international tensions and a shift towards economic self-sufficiency. These protectionist policies, coupled with increased border controls and reduced                                                                                                                            |                                                |

|                         |                                                                                                  |   |                                                                                                                              |   |                                                                                                                                                                                                                                                                                                                                                                                              |                                                                                                                                                                  |
|-------------------------|--------------------------------------------------------------------------------------------------|---|------------------------------------------------------------------------------------------------------------------------------|---|----------------------------------------------------------------------------------------------------------------------------------------------------------------------------------------------------------------------------------------------------------------------------------------------------------------------------------------------------------------------------------------------|------------------------------------------------------------------------------------------------------------------------------------------------------------------|
|                         |                                                                                                  |   |                                                                                                                              |   | integration with international markets, exacerbate trade barriers, limiting export opportunities and driving up costs.                                                                                                                                                                                                                                                                       |                                                                                                                                                                  |
| International Relations | Level Playing Field Across the Globe (e.g. fair competition and equal standards in global trade) | 5 | Uneven standards put UK farmers at a competitive disadvantage - Global alignment ensures fair competition and market access  | 1 | Uneven standards put UK farmers at a competitive disadvantage. Divergence in agricultural subsidies and trade policies across the four UK nations, combined with lowered environmental and food safety standards, undermines fair competition. UK farmers face uneven playing fields domestically and internationally, reducing competitiveness and exacerbating socio-economic disparities. |                                                                                                                                                                  |
| Natural Resources       | Biodiversity Loss                                                                                | 5 | Declining species - Enhanced biodiversity                                                                                    | 1 | Declining species - In this theory it is rational to protect environment to ensure domestic food production is sustainable but the likeliness of this is low which is self-defeating                                                                                                                                                                                                         | In this theory it is rational to protect environment to ensure domestic food production is sustainable but the likeliness of this is low which is self-defeating |
| Natural Resources       | Water Resource Availability                                                                      | 5 | Scarcity impacts agricultural production - Effective water management leads to sustainable farming                           | 1 | Scarcity impacts agricultural production                                                                                                                                                                                                                                                                                                                                                     |                                                                                                                                                                  |
| Natural Resources       | Land Availability                                                                                | 5 | Limited land availability constrains production and expansion- Ample land resources support growth and sustainable practices | 1 | Limited land availability constrains production and expansion                                                                                                                                                                                                                                                                                                                                |                                                                                                                                                                  |
| Natural Resources       | Soil Health                                                                                      | 5 | Declining soil quality impacts fodder yield for livestock - Improved soil health enhances fodder production for livestock    | 1 | Declining soil quality impacts fodder yield for livestock                                                                                                                                                                                                                                                                                                                                    |                                                                                                                                                                  |

|                                              |                                                      |   |                                                                                                                                           |   |                                                                                                       |                                      |
|----------------------------------------------|------------------------------------------------------|---|-------------------------------------------------------------------------------------------------------------------------------------------|---|-------------------------------------------------------------------------------------------------------|--------------------------------------|
| Natural Resources                            | Climate Resilience                                   | 5 | Lack of strategies leads to vulnerabilities - Robust strategies enhance resilience to climate impacts                                     | 1 | Lack of strategies leads to vulnerabilities                                                           |                                      |
| Animal Health                                | Zoonotic Disease Outbreaks                           | 5 | Frequent outbreaks disrupt livestock production - Rare outbreaks managed effectively with robust biosecurity                              | 1 | Frequent zoonotic disease outbreaks disrupt livestock production with greater impact - less contained | with greater impact - less contained |
| Response to Global Shocks                    | Climate Change Impacts                               | 5 | Severe disruption from frequent extreme weather and climatic changes - Mild impacts, limited extremes                                     | 1 | Severe disruption from frequent extreme weather and climatic changes                                  | important                            |
| Response to Global Shocks                    | Price Volatility                                     | 5 | High price volatility from market disruptions - Stable prices with minimal fluctuations                                                   | 1 | High price volatility from market disruptions                                                         |                                      |
| Response to Global Shocks                    | Pandemic Preparedness                                | 5 | Inadequate response to global health crises - Robust systems in place for quick recovery                                                  | 1 | Inadequate response to global health crises                                                           |                                      |
| UK/Devolved Government Policy and Governance | (In)consistency in Government Policy                 | 4 | Policy inconsistency created confusion and challenges for farmers- A consistent approach provides stability and a clear direction         | 1 | Policy inconsistency created confusion and challenges for farmers                                     |                                      |
| Technology                                   | Alternative Protein Technologies                     | 3 | Niche market with minimal impact - Rapid growth disrupting conventional livestock markets                                                 |   |                                                                                                       |                                      |
| Human Health                                 | Access to Healthcare                                 | 2 | Disparities in healthcare access - Equal access to quality healthcare for all                                                             |   |                                                                                                       |                                      |
| Animal Health                                | Antimicrobial Resistance (AMR)                       | 2 | Rapid rise in AMR due to overuse of antibiotics in livestock farming - AMR controlled through alternative practices and strict regulation | 1 | Rapid rise in AMR due to overuse of antibiotics in livestock farming                                  |                                      |
| Animal Health                                | Animal Welfare Regulations                           | 2 | Minimal welfare improvements - Strict enforcement leads to significant welfare enhancements                                               | 1 | Minimal animal welfare improvements                                                                   |                                      |
| UK/Devolved Government Policy and Governance | Post-Brexit Agricultural subsidies/Payment Schemes   | 1 | Payment schemes fail - Payment schemes effectively reward sustainable farming                                                             |   |                                                                                                       |                                      |
| UK/Devolved Government Policy and Governance | Public Spending on Agriculture and Rural Development | 1 | Reduced public investment - Increased targeted investment in rural economies and innovation                                               | 1 | Reduced public investment                                                                             |                                      |
| UK/Devolved Government Policy and Governance | Regulation of Agrochemicals                          | 1 | Low regulation - High regulation                                                                                                          | 1 | Low regulation of agrochemicals                                                                       |                                      |
| Public Attitudes                             | Media Influence                                      | 1 | Minimal impact of media on livestock consumption choices - Significant influence of media                                                 |   |                                                                                                       |                                      |

|                         |                                               |   |                                                                                                                                              |   |                                                                                             |
|-------------------------|-----------------------------------------------|---|----------------------------------------------------------------------------------------------------------------------------------------------|---|---------------------------------------------------------------------------------------------|
| Education               | Public R&D Funding                            | 1 | Insufficient funding hinders R&D innovation - Strong funding drives advancement in agri-food innovation                                      | 1 | Insufficient funding hinders R&D innovation                                                 |
| Education               | Agri-Food Education and Training              | 1 | Lack of training restricts innovation - Quality education promotes widespread innovation                                                     | 1 | Lack of training restricts innovation                                                       |
| Education               | Climate Literacy                              | 1 | Limited understanding of climate interactions with agriculture - High levels of climate literacy drive sustainable practices                 | 1 | Limited understanding of climate interactions with agriculture                              |
| Human Health            | Diet-Related Diseases                         | 1 | Rising prevalence of diet-related disease due to high consumption of red and processed meat - Healthier diets improve public health outcomes | 1 | Rising prevalence of diet-related disease due to high consumption of red and processed meat |
| International Relations | Geopolitical Upheaval and Instability         |   | Impact on food security due to global conflicts - Strong international alliances boosting trade                                              |   |                                                                                             |
| Economic Development    | Rural Economics                               |   | Lack of investment in rural infrastructure - Targeted investment in rural areas                                                              |   |                                                                                             |
| Economic Development    | Producer Profitability                        |   | Low profitability - High profitability                                                                                                       |   |                                                                                             |
| Economic Development    | Critical Mass of Livestock Industries         |   | A shock disrupts allied professions leading to industry collapse - Strong interdependence sustains the industry through challenges           |   |                                                                                             |
| Economic Development    | Poverty Levels                                |   | Low levels of poverty - High levels of poverty                                                                                               |   |                                                                                             |
| Economic Development    | Intra-UK Trade/Internal Market Act            |   | No barrier to trade between nations - Major obstacles due to differing policies                                                              |   |                                                                                             |
| Economic Development    | Employment                                    |   | Decline in agricultural jobs - Job growth and new opportunities                                                                              |   |                                                                                             |
| Social Structure        | Rural-Urban Income Inequality                 |   | Rising rural-urban income gap - Balanced economic development reducing inequalities                                                          |   |                                                                                             |
| Social Structure        | Balance of Small/Large Farms                  |   | Smaller farms squeezed out by larger farms - Balanced system                                                                                 |   |                                                                                             |
| Social Structure        | Concentration of Ownership in Food Production |   | Low concentration - High concentration                                                                                                       |   |                                                                                             |
| Social Structure        | Access to Services                            |   | Limited access to healthcare, education and social services in rural areas - Improved access to services for all communities                 |   |                                                                                             |
| Demography              | Ageing Farming Population                     |   | Fewer young farmers, labour shortages - Increase in young farmers entering the sector                                                        |   |                                                                                             |
| Demography              | Population Growth                             |   | Strain on resources and infrastructure - Balanced growth supports rural and urban areas                                                      |   |                                                                                             |

|                  |                                          |                                                                                                                                                        |                                    |
|------------------|------------------------------------------|--------------------------------------------------------------------------------------------------------------------------------------------------------|------------------------------------|
| Public Attitudes | Consumer Perception of Livestock Farming | Increased opposition to livestock farming leads to decreased consumption - Increased support for livestock farming drives demand for products          |                                    |
| Public Attitudes | Messaging Targeting the Public           | Minimal public messaging - Lots of campaigns influencing perspectives                                                                                  |                                    |
| Public Attitudes | Culture Around Futures                   | Culture war - Harmonised perspectives                                                                                                                  |                                    |
| Public Attitudes | Sustainability Attitudes                 | Limited concern for sustainable livestock farming - Strong demand for sustainable livestock practices                                                  |                                    |
| Public Attitudes | Willingness to Pay for Welfare           | Unwillingness to pay extra for high animal welfare - Willingness to pay a premium for high animal welfare standards                                    |                                    |
| Technology       | Genetics/Gene Editing                    | Conservative genetic improvements through selective breeding - Breakthrough innovations in gene editing leading to disease-resistant, high-yield stock |                                    |
| Technology       | Precision Livestock Farming              | Slow adoption due to high costs/resistance to change - Widespread implementation                                                                       |                                    |
| Food             | Changing Dietary Preferences             | Increased meat consumption - Major shift towards meat alternatives and decline in meat consumption                                                     | Diets at the mercy of free markets |
| Food             | Affordability of Food                    | Unaffordable - Affordable                                                                                                                              |                                    |
| Food             | Length of Supply Chains                  | Short supply chains - Long supply chains                                                                                                               |                                    |
| Food             | Supermarket Power/Influence              | High influence - Low influence                                                                                                                         |                                    |
| Food             | Food Security                            | High levels of food insecurity among vulnerable populations - Improved food security through diversified supply chains                                 |                                    |
| Energy           | Energy Costs                             | Rising energy costs increase production expenses - Stable energy costs reducing pressure on costs                                                      |                                    |
| Energy           | Green Energy Subsidies                   | Low incentives for renewable investments - High subsidies encourage development of green energy                                                        |                                    |
| Energy           | Renewable Energy Adoption                | Low adoption of renewable energy - High investment in renewable energy                                                                                 |                                    |

|                      |                                         |                                                                                              |
|----------------------|-----------------------------------------|----------------------------------------------------------------------------------------------|
| Transport & Mobility | Transport Costs for Livestock Producers | Low transport costs - High costs impact business viability                                   |
| Transport & Mobility | Transport Infrastructure Investment     | Poor infrastructure limits efficiency - Enhanced transport networks strengthen supply chains |

**Table 5 SSP4 Mapping**

| <i>Driver Category</i>                       | <i>Drivers</i>                                       | <i>Importance (1 to 5), highest to lowest</i> | <i>Descriptive range of possible outcomes (1-5)</i>                                                                                | <i>Possible outcome for your SSP</i> | <i>Outcome (based on outcome score and range, incorporating comments/notes)</i>                                                                       | <i>Comments</i>                                     |
|----------------------------------------------|------------------------------------------------------|-----------------------------------------------|------------------------------------------------------------------------------------------------------------------------------------|--------------------------------------|-------------------------------------------------------------------------------------------------------------------------------------------------------|-----------------------------------------------------|
| UK/Devolved Government Policy and Governance | Environmental legislation for livestock sector       | 5                                             | Low regulation - High regulation                                                                                                   | 1                                    | Low regulation for technology and land use                                                                                                            | low regulation for tech and land use                |
| UK/Devolved Government Policy and Governance | Post-Brexit Agricultural subsidies/Payment Schemes   | 5                                             | Payment schemes fail - Payment schemes effectively reward sustainable farming                                                      | 1                                    | Removal of subsidies                                                                                                                                  | removal of subsidies                                |
| UK/Devolved Government Policy and Governance | Public Spending on Agriculture and Rural Development | 5                                             | Reduced public investment - Increased targeted investment in rural economies and innovation                                        | 5                                    | Increased targeted investment in rural economies and innovation                                                                                       | targeted investment                                 |
| UK/Devolved Government Policy and Governance | (In)consistency in Government Policy                 | 5                                             | Policy inconsistency created confusion and challenges for farmers- A consistent approach provides stability and a clear direction  | 1                                    | Policy inconsistency creates confusion and challenges for farmer                                                                                      |                                                     |
| UK/Devolved Government Policy and Governance | Devolution in Agricultural Policy                    | 5                                             | Distinct policies in devolved nations - Consistent UK-wide approach                                                                | 1                                    | Distinct policies in devolved nations                                                                                                                 |                                                     |
| Economic Development                         | Rural Economics                                      | 5                                             | Lack of investment in rural infrastructure - Targeted investment in rural areas                                                    | 4                                    | Some targeted investment in rural areas e.g. in infrastructure and farm extension services                                                            | e.g. in infrastructure and farm extension services  |
| Economic Development                         | Producer Profitability                               | 5                                             | Low profitability - High profitability                                                                                             | 5                                    | High profitability                                                                                                                                    |                                                     |
| Economic Development                         | Critical Mass of Livestock Industries                | 5                                             | A shock disrupts allied professions leading to industry collapse - Strong interdependence sustains the industry through challenges | 4                                    | Sector is not fully cohesive. Some actors are powerful and resilient. There is also a divergence of livestock types - more intensive systems prosper. | not cohesive but some actors resilient and powerful |
| Economic Development                         | Poverty Levels                                       | 5                                             | Low levels of poverty - High levels of poverty                                                                                     | 5                                    | Increasing inequities                                                                                                                                 | increasing inequities                               |
| Economic Development                         | Intra-UK Trade/Internal Market Act                   | 5                                             | No barrier to trade between nations - Major obstacles due to differing policies                                                    | 2                                    | No new barriers to Intra-UK Trade/Internal Market Act                                                                                                 | no new barriers                                     |
| Economic Development                         | Employment                                           | 5                                             | Decline in agricultural jobs - Job growth and new opportunities                                                                    | 1                                    | Decline in agricultural jobs due to efficiency improvements & automation                                                                              | efficiency improvements & automation                |

|                  |                                               |   |                                                                                                                                                        |   |                                                                                                                                    |                                                            |
|------------------|-----------------------------------------------|---|--------------------------------------------------------------------------------------------------------------------------------------------------------|---|------------------------------------------------------------------------------------------------------------------------------------|------------------------------------------------------------|
| Social Structure | Concentration of Ownership in Food Production | 5 | Low concentration - High concentration                                                                                                                 | 5 | Increased concentration of ownership leads to reduced competition, lower prices for producers, and potentially lower food quality. |                                                            |
| Technology       | Genetics/Gene Editing                         | 5 | Conservative genetic improvements through selective breeding - Breakthrough innovations in gene editing leading to disease-resistant, high-yield stock | 5 | Decreased regulation allows for new innovations to emerge in gene editing leading to disease-resistant, high-yield stock           | decreased regulation allows for innovation to emerge       |
| Technology       | Alternative Protein Technologies              | 5 | Niche market with minimal impact - Rapid growth disrupting conventional livestock markets                                                              | 2 | Low demand for alternative protein technologies limits sector                                                                      | low demand limits sector                                   |
| Technology       | Precision Livestock Farming                   | 5 | Slow adoption due to high costs/resistance to change - Widespread implementation                                                                       | 5 | Widespread implementation of Precision Livestock Farming                                                                           | deteriorating outcomes across all environmental indicators |
| Energy           | Energy Costs                                  | 5 | Rising energy costs increase production expenses - Stable energy costs reducing pressure on costs                                                      | 4 | Reasonably stable energy costs, maybe even cheaper costs but unequally distributed                                                 | maybe even cheaper costs but unequal distributed           |
| Energy           | Renewable Energy Adoption                     | 5 | Low adoption of renewable energy - High investment in renewable energy                                                                                 | 5 | lots of investment in renewable energy; decentralised network                                                                      | lots of investment; decentralised network                  |
| Social Structure | Rural-Urban Income Inequality                 | 4 | Rising rural-urban income gap - Balanced economic development reducing inequalities                                                                    | 1 | Rising rural-urban income gap                                                                                                      |                                                            |
| Social Structure | Balance of Small/Large Farms                  | 4 | Smaller farms squeezed out by larger farms - Balanced system                                                                                           | 1 | Smaller farms squeezed out by larger farms                                                                                         |                                                            |
| Social Structure | Access to Services                            | 4 | Limited access to healthcare, education and social services in rural areas - Improved access to services for all communities                           | 1 | increased inequities in access to healthcare, education and social services in rural areas                                         | increased inequities in access                             |
| Public Attitudes | Consumer Perception of Livestock Farming      | 4 | Increased opposition to livestock farming leads to decreased consumption - Increased support for livestock farming drives demand for products          | 4 | Reasonably strong support for livestock farming drives demand for products                                                         |                                                            |
| Public Attitudes | Media Influence                               | 4 | Minimal impact of media on livestock consumption choices - Significant influence of media                                                              | 2 | Some influence of media on livestock consumption choices                                                                           | some influence                                             |

|                                              |                                |   |                                                                                                                              |   |                                                                                                                                                                  |                              |
|----------------------------------------------|--------------------------------|---|------------------------------------------------------------------------------------------------------------------------------|---|------------------------------------------------------------------------------------------------------------------------------------------------------------------|------------------------------|
| Public Attitudes                             | Messaging Targeting the Public | 4 | Minimal public messaging - Lots of campaigns influencing perspectives                                                        | 1 | Minimal public messaging                                                                                                                                         | minimal public messaging     |
| Public Attitudes                             | Culture Around Futures         | 4 | Culture war - Harmonised perspectives                                                                                        | 2 | conflict and polarisation in attitudes / perspectives on future                                                                                                  | conflict and polarisation    |
| UK/Devolved Government Policy and Governance | Regulation of Agrochemicals    | 3 | Low regulation - High regulation                                                                                             | 1 | Low regulation of agrichemical and less monitoring of pollution                                                                                                  | less monitoring of pollution |
| International Relations                      | International Trade Standards  | 3 | Divergence from international welfare and food standards - Alignment with international standards                            | 1 | The focus on economic growth and the weakening of environmental regulations may lead to divergence from international standards for animal welfare/ food safety. |                              |
| Food                                         | Changing Dietary Preferences   | 3 | Increased meat consumption - Major shift towards meat alternatives and decline in meat consumption                           | 3 | No change in meat consumption                                                                                                                                    | no change                    |
| Food                                         | Affordability of Food          | 3 | Unaffordable - Affordable                                                                                                    | 1 | Food more expensive                                                                                                                                              | food more expensive          |
| Food                                         | Supermarket Power/Influence    | 3 | High influence - Low influence                                                                                               | 1 | High Supermarket Power/Influence                                                                                                                                 |                              |
| Food                                         | Food Security                  | 3 | High levels of food insecurity among vulnerable populations - Improved food security through diversified supply chains       | 1 | High levels of food insecurity among vulnerable populations                                                                                                      | food insecurity increases    |
| Education                                    | Public R&D Funding             | 3 | Insufficient funding hinders R&D innovation - Strong funding drives advancement in agri-food innovation                      | 5 | Strong funding drives advancement in agri-food innovation                                                                                                        |                              |
| Natural Resources                            | Biodiversity Loss              | 2 | Declining species - Enhanced biodiversity                                                                                    | 1 | Declining species and Biodiversity loss                                                                                                                          |                              |
| Natural Resources                            | Water Resource Availability    | 2 | Scarcity impacts agricultural production - Effective water management leads to sustainable farming                           | 1 | Scarcity of Water Resource Availability impacts agricultural production                                                                                          |                              |
| Natural Resources                            | Land Availability              | 2 | Limited land availability constrains production and expansion- Ample land resources support growth and sustainable practices |   | Some limits on land availability constrains production and expansion due to high land use for energy                                                             | used for energy?             |
| Natural Resources                            | Soil Health                    | 2 | Declining soil quality impacts fodder yield for livestock - Improved soil health enhances fodder production for livestock    | 1 | Declining soil quality impacts fodder yield for livestock                                                                                                        |                              |

|                           |                    |   |                                                                                                       |   |                                                                                            |                                                       |
|---------------------------|--------------------|---|-------------------------------------------------------------------------------------------------------|---|--------------------------------------------------------------------------------------------|-------------------------------------------------------|
| Natural Resources         | Climate Resilience | 2 | Lack of strategies leads to vulnerabilities - Robust strategies enhance resilience to climate impacts | 1 | Some are left exposed to climate effects, others are resilient through high tech solutions | increased inequity - 5 for of population 1 for others |
| Response to Global Shocks | Price Volatility   | 2 | High price volatility from market disruptions - Stable prices with minimal fluctuations               | 1 | High price volatility from market disruptions                                              | bad outcomes include increased price volatility       |

**Table 6 SSP5 Mapping**

| <i>Driver Category</i> | <i>Drivers</i>                                | <i>Importance (1 to 5), highest to lowest</i> | <i>Descriptive range of possible outcomes (1-5)</i>                                                                                                    | <i>Possible outcome for your SSP</i> | <i>Outcome (based on outcome score and range, incorporating comments/notes)</i>                    | <i>Comments</i>                                          |
|------------------------|-----------------------------------------------|-----------------------------------------------|--------------------------------------------------------------------------------------------------------------------------------------------------------|--------------------------------------|----------------------------------------------------------------------------------------------------|----------------------------------------------------------|
| Economic Development   | Rural Economics                               | 5                                             | Lack of investment in rural infrastructure - Targeted investment in rural areas                                                                        | 5                                    | Targeted investment in rural areas in intensified agriculture                                      | investment in intensified ag                             |
| Social Structure       | Balance of Small/Large Farms                  | 5                                             | Smaller farms squeezed out by larger farms - Balanced system                                                                                           | 1                                    | Smaller farms squeezed out by larger farms                                                         | larger farms                                             |
| Social Structure       | Concentration of Ownership in Food Production | 5                                             | Low concentration - High concentration                                                                                                                 | 5                                    | High concentration of ownership in food production that is large and intensive                     | high - large and intensive                               |
| Technology             | Genetics/Gene Editing                         | 5                                             | Conservative genetic improvements through selective breeding - Breakthrough innovations in gene editing leading to disease-resistant, high-yield stock | 5                                    | Breakthrough innovations in gene editing leading to disease-resistant, high-yield stock            | intensive farming = gene editing                         |
| Technology             | Precision Livestock Farming                   | 5                                             | Slow adoption due to high costs/resistance to change - Widespread implementation                                                                       | 5                                    | Widespread implementation of precision livestock farming                                           |                                                          |
| Natural Resources      | Climate Resilience                            | 5                                             | Lack of strategies leads to vulnerabilities - Robust strategies enhance resilience to climate impacts                                                  | 1                                    | Very poor climate resilience and lack of strategies leads to vulnerabilities                       | very poor                                                |
| Energy                 | Energy Costs                                  | 5                                             | Rising energy costs increase production expenses - Stable energy costs reducing pressure on costs                                                      | 5                                    | Cheap and stable domestic energy costs reduce cost pressure on farmers and increases profitability | cheap domestic energy = more profitability for livestock |
| Human Health           | Diet-Related Diseases                         | 5                                             | Rising prevalence of diet-related disease due to high consumption of red and processed meat - Healthier diets improve public health outcomes           | 1                                    | Rising prevalence of diet-related disease due to high consumption of red and processed meat        | high red meat consumption                                |

|                                              |                                                      |   |                                                                                                                                           |        |                                                                                         |                                                                        |
|----------------------------------------------|------------------------------------------------------|---|-------------------------------------------------------------------------------------------------------------------------------------------|--------|-----------------------------------------------------------------------------------------|------------------------------------------------------------------------|
| Animal Health                                | Antimicrobial Resistance (AMR)                       | 5 | Rapid rise in AMR due to overuse of antibiotics in livestock farming - AMR controlled through alternative practices and strict regulation | 1      | Rapid rise in AMR due to overuse of antibiotics in intensive livestock farming          | higher medication under intensification                                |
| Transport & Mobility                         | Transport Costs for Livestock Producers              | 5 | Low transport costs - High costs impact business viability                                                                                | 1      | Low transport costs with high efficiency                                                | low transport costs + high efficiency                                  |
| Response to Global Shocks                    | Climate Change Impacts                               | 5 | Severe disruption from frequent extreme weather and climatic changes - Mild impacts, limited extremes                                     | 1      | Very severe disruption from frequent extreme weather and climatic changes               | very severe disruption in longer term                                  |
| Other                                        | Mental Health & wellbeing                            | 5 |                                                                                                                                           |        | Poor mental health under climate change and horrible intensive systems                  | poor mental health under climate change and horrible intensive systems |
| Education                                    | Climate Literacy                                     | 4 | Limited understanding of climate interactions with agriculture - High levels of climate literacy drive sustainable practices              | 1      | Limited understanding of climate interactions with agriculture                          | low climate literacy = bad effects, very limited climate literacy      |
| UK/Devolved Government Policy and Governance | Public Spending on Agriculture and Rural Development | 3 | Reduced public investment - Increased targeted investment in rural economies and innovation                                               | 3      | Some public investment, particularly targeted investment in intensification innovations | support for intensification                                            |
| International Relations                      | Global Supply Chain Resilience                       | 3 | Frequent disruptions - Resilient diversified supply chains                                                                                | 1      | Frequent disruptions to global supply chains and low resilience due to climate change   | low resilience due to climate change                                   |
| International Relations                      | Geopolitical Upheaval and Instability                | 3 | Impact on food security due to global conflicts - Strong international alliances boosting trade                                           | 3      | Some geopolitical upheaval and instability due to conflict over climate change          | conflict from climate change                                           |
| Education                                    | Public R&D Funding                                   | 2 | Insufficient funding hinders R&D innovation - Strong funding drives advancement in agri-food innovation                                   | 3      | Some R&D funding for intensive farming innovations                                      | innovation for intensive farms                                         |
| UK/Devolved Government Policy and Governance | Environmental legislation for livestock sector       | 1 | Low regulation - High regulation                                                                                                          | 1      | Low regulation and environmental legislation for livestock sector                       | low regulation                                                         |
| UK/Devolved Government Policy and Governance | Post-Brexit Agricultural subsidies/Payment Schemes   | 1 | Payment schemes fail - Payment schemes effectively reward sustainable farming                                                             | 1 or 3 | Low environmental regulation with direct subsidies instead                              | low regulation/ direct subsidies                                       |

|                                              |                                                                                                  |   |                                                                                                                                      |   |                                                                                                               |                                                                                           |
|----------------------------------------------|--------------------------------------------------------------------------------------------------|---|--------------------------------------------------------------------------------------------------------------------------------------|---|---------------------------------------------------------------------------------------------------------------|-------------------------------------------------------------------------------------------|
| UK/Devolved Government Policy and Governance | (In)consistency in Government Policy                                                             | 1 | Policy inconsistency creates confusion and challenges for farmers- A consistent approach provides stability and a clear direction    | 1 | Policy inconsistency creates confusion and challenges for farmers                                             |                                                                                           |
| UK/Devolved Government Policy and Governance | Devolution in Agricultural Policy                                                                | 1 | Distinct policies in devolved nations - Consistent UK-wide approach                                                                  | 1 | Distinct policies in devolved nations                                                                         |                                                                                           |
| International Relations                      | International Trade Standards                                                                    | 1 | Divergence from international welfare and food standards - Alignment with international standards                                    | 1 | Divergence from international welfare and food standards                                                      | low commodity standard                                                                    |
| International Relations                      | Trade Agreement/Barriers                                                                         | 1 | Protectionism and trade barriers stifle exports and increase costs - Open trade agreements reduce barriers and enhance market access |   |                                                                                                               |                                                                                           |
| International Relations                      | Level Playing Field Across the Globe (e.g. fair competition and equal standards in global trade) | 1 | Uneven standards put UK farmers at a competitive disadvantage - Global alignment ensures fair competition and market access          | 1 |                                                                                                               |                                                                                           |
| Food                                         | Changing Dietary Preferences                                                                     | 1 | Increased meat consumption - Major shift towards meat alternatives and decline in meat consumption                                   |   | Increased meat consumption                                                                                    | increased meat                                                                            |
| Energy                                       | Renewable Energy Adoption                                                                        | 1 | Low adoption of renewable energy - High investment in renewable energy                                                               |   | Low adoption of renewables for energy                                                                         | low adoption of renewables                                                                |
| UK/Devolved Government Policy and Governance | Regulation of Agrochemicals                                                                      |   | Low regulation - High regulation                                                                                                     |   |                                                                                                               |                                                                                           |
| Economic Development                         | Producer Profitability                                                                           |   | Low profitability - High profitability                                                                                               | 5 | High profitability due to cheap energy initially, but then low profitability eventually due to climate change | cheap energy = profitable but then low profitability in later years due to climate change |
| Economic Development                         | Critical Mass of Livestock Industries                                                            |   | A shock disrupts allied professions leading to industry collapse - Strong interdependence sustains the industry through challenges   |   |                                                                                                               |                                                                                           |
| Economic Development                         | Poverty Levels                                                                                   |   | Low levels of poverty - High levels of poverty                                                                                       | 1 | Low levels of poverty                                                                                         | low levels = more meat consumed                                                           |
| Economic Development                         | Intra-UK Trade/Internal Market Act                                                               |   | No barrier to trade between nations - Major obstacles due to differing policies                                                      |   |                                                                                                               |                                                                                           |

|                      |                                          |                                                                                                                                               |   |                                                                       |                                      |
|----------------------|------------------------------------------|-----------------------------------------------------------------------------------------------------------------------------------------------|---|-----------------------------------------------------------------------|--------------------------------------|
| Economic Development | Employment                               | Decline in agricultural jobs - Job growth and new opportunities                                                                               |   |                                                                       |                                      |
| Social Structure     | Rural-Urban Income Inequality            | Rising rural-urban income gap - Balanced economic development reducing inequalities                                                           |   |                                                                       |                                      |
| Social Structure     | Access to Services                       | Limited access to healthcare, education and social services in rural areas - Improved access to services for all communities                  |   |                                                                       |                                      |
| Demography           | Ageing Farming Population                | Fewer young farmers, labour shortages - Increase in young farmers entering the sector                                                         |   |                                                                       |                                      |
|                      | Population Growth                        | Strain on resources and infrastructure - Balanced growth supports rural and urban areas                                                       |   |                                                                       |                                      |
| Public Attitudes     | Consumer Perception of Livestock Farming | Increased opposition to livestock farming leads to decreased consumption - Increased support for livestock farming drives demand for products |   |                                                                       |                                      |
| Public Attitudes     | Media Influence                          | Minimal impact of media on livestock consumption choices - Significant influence of media                                                     |   |                                                                       |                                      |
| Public Attitudes     | Messaging Targeting the Public           | Minimal public messaging - Lots of campaigns influencing perspectives                                                                         |   |                                                                       |                                      |
| Public Attitudes     | Culture Around Futures                   | Culture war - Harmonised perspectives                                                                                                         |   |                                                                       |                                      |
| Public Attitudes     | Sustainability Attitudes                 | Limited concern for sustainable livestock farming - Strong demand for sustainable livestock practices                                         |   |                                                                       |                                      |
| Public Attitudes     | Willingness to Pay for Welfare           | Unwillingness to pay extra for high animal welfare - Willingness to pay a premium for high animal welfare standards                           |   |                                                                       |                                      |
| Technology           | Alternative Protein Technologies         | Niche market with minimal impact - Rapid growth disrupting conventional livestock markets                                                     | 1 | Niche market for alternative protein technologies with minimal impact | cheap enough would stifle innovation |
| Natural Resources    | Biodiversity Loss                        | Declining species - Enhanced biodiversity                                                                                                     | 1 | Declining species across the UK                                       | declining species across the UK      |
| Natural Resources    | Water Resource Availability              | Scarcity impacts agricultural production - Effective water management leads to sustainable farming                                            |   |                                                                       |                                      |
| Natural Resources    | Land Availability                        | Limited land availability constrains production and expansion- Ample land resources support growth and sustainable practices                  | 1 | Limited land availability constrains production and expansion         | limited land                         |

|                           |                                     |                                                                                                                           |   |                                                                      |                               |
|---------------------------|-------------------------------------|---------------------------------------------------------------------------------------------------------------------------|---|----------------------------------------------------------------------|-------------------------------|
| Natural Resources         | Soil Health                         | Declining soil quality impacts fodder yield for livestock - Improved soil health enhances fodder production for livestock | 1 | Very poor, declining soil quality impacts fodder yield for livestock | very poor                     |
| Food                      | Affordability of Food               | Unaffordable - Affordable                                                                                                 |   |                                                                      |                               |
| Food                      | Length of Supply Chains             | Short supply chains - Long supply chains                                                                                  |   |                                                                      |                               |
| Food                      | Supermarket Power/Influence         | High influence - Low influence                                                                                            |   |                                                                      |                               |
| Food                      | Food Security                       | High levels of food insecurity among vulnerable populations - Improved food security through diversified supply chains    |   |                                                                      |                               |
| Energy                    | Green Energy Subsidies              | Low incentives for renewable investments - High subsidies encourage development of green energy                           |   |                                                                      |                               |
| Education                 | Agri-Food Education and Training    | Lack of training restricts innovation - Quality education promotes widespread innovation                                  |   |                                                                      |                               |
| Human Health              | Access to Healthcare                | Disparities in healthcare access - Equal access to quality healthcare for all                                             |   |                                                                      |                               |
| Animal Health             | Animal Welfare Regulations          | Minimal welfare improvements - Strict enforcement leads to significant welfare enhancements                               |   |                                                                      |                               |
| Animal Health             | Zoonotic Disease Outbreaks          | Frequent outbreaks disrupt livestock production - Rare outbreaks managed effectively with robust biosecurity              |   |                                                                      |                               |
| Transport & Mobility      | Transport Infrastructure Investment | Poor infrastructure limits efficiency - Enhanced transport networks strengthen supply chains                              |   |                                                                      |                               |
| Response to Global Shocks | Price Volatility                    | High price volatility from market disruptions - Stable prices with minimal fluctuations                                   |   |                                                                      |                               |
| Response to Global Shocks | Pandemic Preparedness               | Inadequate response to global health crises - Robust systems in place for quick recovery                                  |   |                                                                      |                               |
| Other                     | Intensification                     |                                                                                                                           | 5 | High intensification                                                 |                               |
| Other                     | Imported fertilisers                |                                                                                                                           |   |                                                                      | increasing negative           |
| Other                     | Innovation                          |                                                                                                                           |   |                                                                      | low innovation (cheap energy) |
| Other                     | (Tech) new feed innovation          |                                                                                                                           |   |                                                                      |                               |
| Other                     | Chemical fertilisers & pesticides   |                                                                                                                           |   |                                                                      |                               |

**Table 7 Key outcomes and suggestions from Workshop 1 and 2**

| SSP  | Workshop 1 Key Outcomes                                                                                                                                                                                                                                                                         | Workshop 2 Key Suggestions                                                                                                                                                                                                                                                                                                                                                                                                                                                                 |
|------|-------------------------------------------------------------------------------------------------------------------------------------------------------------------------------------------------------------------------------------------------------------------------------------------------|--------------------------------------------------------------------------------------------------------------------------------------------------------------------------------------------------------------------------------------------------------------------------------------------------------------------------------------------------------------------------------------------------------------------------------------------------------------------------------------------|
| SSP1 | “High regulation and environmental legislation”, payments “reward[ing] sustainable farming”, “decline in meat consumption”, “welfare enhancements”, “investment in rural economies and innovation”, “renewable[s]”, “improved soil”, “biodiversity”, “water management” and “resilience”        | “Nothing transformative enough ... it should do more”, citing “35% less meat consumption” by 2050 and asking, “Who has the power in this scenario?” Called for links between “human-animal interaction” and farmer well-being; “pasture-fed [and] correct stocking density brings grassland structural diversity”. “Change in funding will change the life of upland farmers”; “ultra-processed food – needs pressure from government to reduce.”                                          |
| SSP2 | “Some policy inconsistency”, payment schemes “only relatively successful at rewarding sustainable farming”, “alternative proteins experience moderate growth, but with some resistance”, “rural-urban income gap”, and “public-private partnerships” investing in technology and renewables.    | Highlighted “mental health among farmers” and clearer “distinction between ‘traditional’ and ‘conventional’ farming”. Suggested additions “marketing ... influence on children’s food preferences”, “inequality in access to healthier food options”, and “large corporations ... perpetuating profit-driven, unsustainable food systems”.                                                                                                                                                 |
| SSP3 | “Divergent policies in devolved nations”, “international tensions”, “trade barriers”, “low regulation and environmental legislation”, “self-sufficiency”, “declining soil quality”, “limited land availability constrains production and expansion”, and “frequent zoonotic disease outbreaks”. | Asked for more “geographical specificity” and sector differentiation. Noted the impact of reduced imports, and suggested “dry and store” methods, e.g. “turn milk into powder”. Questioned, “Is making the UK more self-reliant ... actually good?” Some saw “short term pain ... long term gain ... resilient farmers thrived”; others warned of “lack of discussion between countries” on zoonoses.                                                                                      |
| SSP4 | “Increasing inequities”, “increased concentration of ownership”, “low regulation for technology and land use”, “removal of subsidies”, “high profitability”, “more intensive systems”, “decline in agricultural jobs due to ... automation”, and “investment in renewable energy”.              | Proposed “intensive and extensive systems [would] operate together”, raising “where would the feed come from?” Rather than small farms being pushed out, suggested “operations will become bigger” and some “cooperation between family farms”. Suggested precision care could help but “so much depends on stewardship ... empathy with animals”. Warned of “very poor low-quality meat”, e.g. “mechanically recovered meat” in this future.                                              |
| SSP5 | “Cheap and stable domestic energy costs”, investment in “intensified agriculture”, “overuse of antibiotics”, “breakthrough innovations”, “high-yield stock”, “diet-related disease due to high consumption of red and processed meat”, and “poor mental health”.                                | “Automation can be useful ... doesn’t necessarily improve animal welfare”; “having a farmer present... remains more valuable”. “Precision farming and genetics” could “breed disease-resistant animals”, but “high-tech, high-input farming” risks “environmental degradation”. “Ultra-processed diets contribute to a health crisis”; fish would “sharply decline ... due to depletion of fish stocks”. Inequality was “underplayed”, with “concentration of wealth and corporate power.” |
